# Supplementary material for: How do patients and general practitioners in Denmark perceive the communicative advantages and disadvantages of access via email consultations? A media-theoretical qualitative study
Source: PubMed Central journal article supplement — BMJ Open. 2020 Oct 26;10(10):e039442. doi: 10.1136/bmjopen-2020-039442 (PMC7592270; doi:10.1136/bmjopen-2020-039442), 2020-10-26
Supplement: bmjopen-2020-039442.draft_revisions.pdf [file bmjopen-2020-039442.draft_revisions.pdf]

# BMJ Open

BMJ Open is committed to open peer review. As part of this commitment we make the peer review history of every article we publish publicly available.

When an article is published we post the peer reviewers' comments and the authors' responses online. We also post the versions of the paper that were used during peer review. These are the versions that the peer review comments apply to.

The versions of the paper that follow are the versions that were submitted during the peer review process. They are not the versions of record or the final published versions. They should not be cited or distributed as the published version of this manuscript.

BMJ Open is an open access journal and the full, final, typeset and author-corrected version of record of the manuscript is available on our site with no access controls, subscription charges or pay-per-view fees (<http://bmjopen.bmj.com>).

If you have any questions on BMJ Open's open peer review process please email [info.bmjopen@bmj.com](mailto:info.bmjopen@bmj.com)

# BMJ Open

## How do patients and general practitioners in Denmark perceive the communicative advantages and disadvantages of access via email consultations? A media-theoretical qualitative study

|                               |                                                                                                                                                                                                                                                                                                                                                                                 |
|-------------------------------|---------------------------------------------------------------------------------------------------------------------------------------------------------------------------------------------------------------------------------------------------------------------------------------------------------------------------------------------------------------------------------|
| Journal:                      | <i>BMJ Open</i>                                                                                                                                                                                                                                                                                                                                                                 |
| Manuscript ID                 | bmjopen-2020-039442                                                                                                                                                                                                                                                                                                                                                             |
| Article Type:                 | Original research                                                                                                                                                                                                                                                                                                                                                               |
| Date Submitted by the Author: | 15-Apr-2020                                                                                                                                                                                                                                                                                                                                                                     |
| Complete List of Authors:     | Grønning, Anette; University of Southern Denmark, Department for the Study of Culture<br>Assing Hvidt, Elisabeth; University of Southern Denmark, Research Unit of General Practice, Department of Public Health<br>Brøgger, Matilde; Aarhus University, School of Communication and Culture<br>Fage-Butler, Antoinette; Aarhus University, School of Communication and Culture |
| Keywords:                     | QUALITATIVE RESEARCH, PRIMARY CARE, Telemedicine < BIOTECHNOLOGY & BIOINFORMATICS                                                                                                                                                                                                                                                                                               |
|                               |                                                                                                                                                                                                                                                                                                                                                                                 |

SCHOLARONE™  
Manuscripts

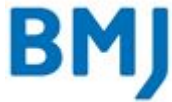

I, the Submitting Author has the right to grant and does grant on behalf of all authors of the Work (as defined in the below author licence), an exclusive licence and/or a non-exclusive licence for contributions from authors who are: i) UK Crown employees; ii) where BMJ has agreed a CC-BY licence shall apply, and/or iii) in accordance with the terms applicable for US Federal Government officers or employees acting as part of their official duties; on a worldwide, perpetual, irrevocable, royalty-free basis to BMJ Publishing Group Ltd ("BMJ") its licensees and where the relevant Journal is co-owned by BMJ to the co-owners of the Journal, to publish the Work in this journal and any other BMJ products and to exploit all rights, as set out in our [licence](#).

The Submitting Author accepts and understands that any supply made under these terms is made by BMJ to the Submitting Author unless you are acting as an employee on behalf of your employer or a postgraduate student of an affiliated institution which is paying any applicable article publishing charge ("APC") for Open Access articles. Where the Submitting Author wishes to make the Work available on an Open Access basis (and intends to pay the relevant APC), the terms of reuse of such Open Access shall be governed by a Creative Commons licence – details of these licences and which [Creative Commons](#) licence will apply to this Work are set out in our licence referred to above.

Other than as permitted in any relevant BMJ Author's Self Archiving Policies, I confirm this Work has not been accepted for publication elsewhere, is not being considered for publication elsewhere and does not duplicate material already published. I confirm all authors consent to publication of this Work and authorise the granting of this licence.

1  
2  
3 **TITLE PAGE**  
4

5 **How do patients and general practitioners in Denmark perceive the communicative**  
6 **advantages and disadvantages of access via email consultations? A media-theoretical**  
7 **qualitative study**  
8  
9

10  
11 Anette Grønning<sup>1</sup>, Elisabeth Assing Hvidt<sup>1,2</sup>, Matilde Nisbeth Brøgger<sup>3</sup> & Antoinette Fage-  
12 Butler<sup>3</sup>  
13  
14

15  
16  
17  
18 <sup>1</sup> Department for the Study of Culture, University of Southern Denmark, Campusvej 55, 5230  
19 Odense M, Denmark. [ahg@sdu.dk](mailto:ahg@sdu.dk)  
20  
21

22  
23 <sup>2</sup> Research Unit of General Practice, Department of Public Health, University of Southern  
24 Denmark, J.B. Winsløvs Vej 9A, 5000 Odense C, Denmark. [ehvidt@health.sdu.dk](mailto:ehvidt@health.sdu.dk)  
25  
26

27  
28 <sup>3</sup> School of Communication and Culture, Aarhus University, Jens Chr. Skous Vej 4, 8000 Aarhus  
29 C, Denmark. [matnj@cc.au.dk](mailto:matnj@cc.au.dk) & [fage-butler@cc.au.dk](mailto:fage-butler@cc.au.dk)  
30  
31

32  
33 ---  
34  
35

36 **Corresponding author:** Anette Grønning, Department for the Study of Culture, University of  
37 Southern Denmark, Campusvej 55, 5230 Odense M, Denmark. [ahg@sdu.dk](mailto:ahg@sdu.dk), +45 6550 4039  
38  
39  
40

41  
42  
43  
44  
45  
46  
47  
48 **Word Count:** 4094 words.  
49  
50

## ABSTRACT

**Objective:** Email consultations (e-consultations) have become part of everyday doctor-patient communication in many countries. The objective of this study is to investigate how patients and general practitioners (GPs) perceive the communicative advantages and disadvantages of access via e-consultations drawing on a media-theoretical perspective.

**Design:** We analysed qualitative interview data from general practices in Denmark to identify salient themes.

**Participants:** Our data set consists of semi-structured interviews with 30 patients and 23 GPs. The data were collected from February 2016 to September 2019.

**Results:** Affordances that emerged include: 1) lower contact threshold, 2) accessing a new interaction space and 3) access to access. From the patients' perspective, e-consultations provided more convenient contact with their GP. From the GPs' perspective, e-consultations facilitated contact with patients whom they otherwise rarely saw, but also resulted in overuse and inappropriate use. Patients and GPs considered e-consultations as inviting new interactions, facilitating new kinds of affective communication. Both patients and GPs experienced e-consultations as a way of achieving untriaged access to face-to-face consultations.

**Conclusion:** Drawing on a media perspective, this study adds knowledge of how the affordances of the medium of e-consultations are perceived by GPs and patients. Understanding users' views on e-consultations' communicative advantages and disadvantages is useful for their further development and for training medical students and other health professionals, and can thus optimize their potential.

## Keywords

E-consultation, access, communicative advantages and disadvantages, affordances, Denmark, email, general practice, computer-mediated communication

## Article Summary

### Strengths and limitations of this study

- The theoretical framework that draws on affordance theory is useful for other studies exploring emerging communicative practices that use new media in healthcare settings.
- The use of interviews to investigate perspectives on e-consultations and a large data set is valuable.
- In addition, it is a strength that the perspectives of both GPs and patients are represented.
- The majority of patients interviewed were born in 1954 or earlier (65+ years) as they participate in email consultations with the highest frequency in Denmark.

## INTRODUCTION

Email consultations (e-consultations) are online consultations that allow general practitioners (GPs) and patients to communicate via e-mail without requiring their physical and/or temporal co-presence<sup>1-4</sup>. E-consultations, which are intended to supplement rather than replace the dyadic encounter in the clinical setting, take place through closed messaging systems that encrypt the exchanges and integrate them into patients' medical records. Uptake of this relatively new form of consultation is contingent on aspects such as political will, technical infrastructures, and the motivation and resources of GPs and patients<sup>4,5</sup>. The use of e-consultations by patients varies considerably among general practices when it comes to frequency and purpose<sup>6</sup>.

A literature review on patients' perspectives on e-consultations<sup>7</sup> found that patients identified greater access to their GPs as one of e-consultations' main advantages. Patient access to healthcare is highly topical as aging populations mean that healthcare systems often strain to meet the growing demand for healthcare. GPs in the Danish context, which is our present concern, are required to see increasing numbers of patients<sup>8</sup>, and Danish patients often struggle to see their GPs at the clinic due to GPs' heavily booked schedules<sup>9</sup>. A sense of inaccessibility may be exacerbated by spatial and physical aspects of the clinical setting, as access is mediated by the gatekeeping role of secretaries, waiting rooms and the temporal framing of the consultation, including GPs' own (need for) time management<sup>10-12</sup>. Commonly reported advantages for GPs include reduced phone load and increased efficiency in administration<sup>13</sup>.

In 2009, a collective agreement made it mandatory for all Danish GPs to offer e-consultations to "increase efficiency and quality through the digitisation of health care"<sup>14</sup>. E-consultations were introduced as a cost-effective, convenient means of providing access to GPs, primarily for

1  
2  
3 communication of test results and quick questions. In Denmark, e-consultation use has increased  
4 steadily since its introduction. A recent study found that Denmark had the highest numbers of  
5 doctor-patient emails sent/received in Europe <sup>5</sup>, making it a forerunner in the adoption of e-  
6 consultations and thus an important case to investigate. By 2018, the number of e-consultations  
7 in Denmark had risen from 1.3 million in 2008 to 7.1 million per year, corresponding to 19% of  
8 all GP consultations <sup>15</sup>.  
9

10  
11  
12  
13  
14  
15 Currently, six different software systems (websites and apps) are used in Danish GP clinics to  
16 manage e-consultations. Clinics decide on which system to use, the amount of text that patients  
17 can produce and whether pictures can be uploaded. The potential for greater access to GPs is  
18 underlined on the websites of Danish GP practices; patients are, for example, told that they can  
19 use e-consultations to contact their GP “24/7” and “day and night”, emphasizing the possibility  
20 of round-the-clock, direct, and patient-instigated access to GPs.  
21  
22  
23  
24  
25  
26

27  
28 Against this backdrop, we address the following research question: *How do patients and GPs in*  
29 *the Danish setting perceive the communicative advantages and disadvantages of the access that*  
30 *the medium of e-consultation provides?* We explore both patients’ and GPs’ perspectives in order  
31 to achieve a fuller understanding of the implications of e-consultations for doctor-patient  
32 communication, and address the research question using qualitative interview data.  
33  
34  
35

36  
37 The theoretical frame that guides our analysis derives from medium theory <sup>16</sup>. We interpret e-  
38 consultations as involving a communication *medium* that facilitates access between patients and  
39 GPs. Communication and media scholars refer to a medium’s “affordances”, meaning the  
40 different ways in which users employ a medium <sup>17 18</sup> and how a medium’s possibilities are  
41 perceived by its users <sup>19</sup>. The concept of affordance helps us identify the limitations and strengths  
42 of the medium’s materiality <sup>20</sup>, also referred to as its *action potentials* <sup>21</sup>. Action potentials  
43 should not be studied purely objectively in terms of technical aspects or purely subjectively in  
44 terms of users’ perspectives; instead, they are best considered as an interplay between humans  
45 and technology <sup>22</sup> that enhance our understanding of how technology is applied and perceived <sup>23-</sup>  
46  
47  
48  
49  
50  
51  
52  
53  
54  
55  
56  
57  
58  
59  
60  
27. More specifically, one recognised technical affordance of e-mails is asynchronous production  
<sup>22 28</sup>, i.e. the possibility of planning, producing, sending and reading digital messages without the  
presence of the other participant(s) in the communication. Using e-mail can be perceived

1  
2  
3 differently depending on factors such as user expectations and context. In order to understand  
4 how the affordances of asynchronous production shape the interplay between technology and  
5 users, interview data are thus highly appropriate.  
6  
7  
8  
9

## 10 11 **METHOD**

12  
13 This paper draws from a larger qualitative study of e-consultations in general practice.  
14  
15

### 16 **Data collection**

17  
18 Our data set consists of semi-structured interviews with 30 patients and 23 GPs. The data were  
19 collected from February 2016 to September 2019. See Table 1 for an overview of the interview  
20 participants.  
21  
22  
23  
24

| Interviews                 | Number of participants | Gender    |           | Age span |
|----------------------------|------------------------|-----------|-----------|----------|
|                            |                        | Female    | Male      |          |
| Patients                   | 30                     | 18        | 12        | 40-91    |
| GPs                        | 23                     | 12        | 11        | 37-70    |
| <b>Participants, total</b> | <b>53</b>              | <b>30</b> | <b>23</b> |          |

25  
26  
27  
28  
29  
30  
31  
32  
33  
34  
35  
36  
37  
38 **Table 1: Overview of interviews**

39  
40  
41 30 patients (18 women and 12 men), aged between 40-91 years, were interviewed individually or  
42 as a couple. All patients were recruited via their GPs through an open call communicated by  
43 word of mouth in our professional network within the Region of Southern Denmark, one of  
44 Denmark's five geographically defined regions. The interviews were conducted face-to-face in a  
45 setting of the patients' own choosing such as their homes (23), a senior activity house (5) and a  
46 public library (2).  
47  
48  
49  
50

51  
52 When selecting GPs for the individual interviews, the aim was to achieve variation with respect  
53 to the GPs' age, gender, practice type, geographical location and years of practice as a GP. The  
54 GPs lived and worked within four of Denmark's five regions: the Region of Southern Denmark  
55  
56  
57



1  
2  
3 (17), the Central Denmark Region (4), the North Denmark Region (1), and the Capital Region of  
4 Denmark (1). The interviews with the GPs were conducted either face-to-face (15) or by  
5 telephone (8).  
6  
7

8  
9 All interviews were conducted by AG and EAH. Semi-structured interview guides included  
10 open-ended questions such as “What are the communicative advantages of the e-consultation, in  
11 your opinion?”, “What are the communication challenges?” and “In what ways, if any, do e-  
12 consultations impact on your relationship with patients/your GP, in your opinion?” Recruitment  
13 of interviewees continued until sufficient information power (also often referred to as  
14 “saturation”) regarding the subject at hand was achieved <sup>29</sup>.  
15  
16  
17  
18

### 19 20 **Data analysis**

21  
22 The interviews were transcribed verbatim and coded using the software program NVivo 12. The  
23 first and second authors, AG and EAH, coded the transcripts in two phases: an initial open  
24 coding and a subsequent closed thematic coding using a node structure that reflected identified  
25 themes and subthemes and allowed for expansion and reduction along the way. This process led  
26 to the identification of the following subthemes: lower contact threshold, asynchronicity,  
27 emotions, perception by GP, and perception by patient. The analytical process was inspired by  
28 Kozinets’ netnographic approach <sup>30</sup> and included coding, note-taking, abstracting/comparing,  
29 checking and refining. All authors compared and discussed the identified themes, relating them  
30 to the original transcripts and aligning them where necessary. This analytical work was carried  
31 out in a dialectic (abductive) process where we went inductively from the empirical examples in  
32 the interviews to the theoretical concepts, and deductively from the theoretical concepts to the  
33 empirical examples from the interviews.  
34  
35  
36  
37  
38  
39  
40  
41  
42

### 43 44 **Patient and public involvement**

45 There was no direct involvement of patients or the public in the design of the present study.  
46  
47  
48  
49

## 50 51 **RESULTS**

### 52 53 **Affordances of e-consultation as a communication medium**

54  
55  
56  
57  
58  
59  
60

1  
2  
3 Focusing on e-consultations as a communication medium, we found that the most prominent  
4 affordances derived from a thematic analysis were: 1) lower contact threshold, 2) accessing a  
5 new interaction space and 3) access to access. From the perspective of the patients and GPs,  
6 these three affordances of e-consultations involved communicative advantages and  
7 disadvantages relating to doctor-patient communication. In the following, we present the three  
8 affordances as perceived by patients and GPs, respectively.  
9

### 14 **Lower contact threshold**

#### 16 Patient perspective

18  
19 With respect to lower contact threshold, the technical affordance ‘asynchronicity’ (cf. section 1.  
20 Introduction) was key. Many patients stated that they were happy not to have to attend the clinic  
21 in person as they found that e-consultations were more convenient than going to see the doctor.  
22 The patients emphasized that they did not want to be any bother, and that e-consultations felt less  
23 disruptive than face-to-face consultations. For example, one patient said, “I don’t want to be any  
24 trouble because it’s probably nothing”, and another, when asked why she preferred e-  
25 consultations stated: “Because [that way] you are not any trouble. They answer when they have  
26 time”.  
27  
28  
29  
30  
31  
32

33 Patients appreciated close contact with their GP which they considered to be facilitated by e-  
34 consultations. At the same time, they knew that GPs are busy as they have many other patients to  
35 take care of. As one patient stated, “I also think that by using e-consultations, it must take some  
36 of the pressure off [the doctor] in [face-to-face] consultations”. Several patients considered their  
37 GP’s workflow and mentioned that if they sent an e-consultation message in the morning, the GP  
38 would answer in the afternoon or the next morning, at the latest. Thus, patients perceived e-  
39 consultations as less disturbing for GPs, which made it easier for them to communicate with their  
40 GP without feeling stressed or under time pressure.  
41  
42  
43  
44  
45  
46  
47  
48

#### 49 GP perspective

50  
51 The technical asynchronicity affordance was thematized recurrently by the GPs as one of the  
52 great advantages of e-consultations for both patients and GPs: “The advantage is that people can  
53 write whenever they want, at night, in the evening, when they are off work and have the time,  
54  
55  
56  
57  
58  
59  
60

1  
2  
3 and the advantage for me as a doctor is that I can look at their inquiries when I have the time”.  
4  
5 Many GPs associated the introduction of e-consultations in general practice with a “lower  
6  
7 contact threshold”, where quick, convenient access was made possible for patients who  
8  
9 otherwise might have had difficulties attending the clinic, for example, due to late working  
10  
11 hours, long travel distances or mental health issues. One GP described how e-consultations had  
12  
13 facilitated increased contact and relationship-building with vulnerable patients, e.g. those  
14  
15 suffering from Asperger’s syndrome or autism, who might be reluctant to see their GP in the  
16  
17 clinic due to their life circumstances.

18 Downsides of a “lower contact threshold” were also mentioned by some GPs. Easy, untriaged  
19  
20 access to GPs in some clinics had led to overuse of e-consultations, with some patients burdening  
21  
22 GPs with high volumes of e-mail correspondence. As one GP put it:

23  
24 As 8,000 patients have round-the-clock access to us, we receive an enormous number of  
25  
26 e-mails. For some reason, there are some doctors whom patients feel a strong affinity for,  
27  
28 and those doctors receive many more e-mails than the others. The emails are not  
29  
30 distributed [between us] because they are not triaged. This kind of untriaged access  
31  
32 overloads some.

33 Furthermore, given the direct access facilitated by e-consultations and the fact that GPs are  
34  
35 obliged to respond to every e-consultation, some GPs narrated that some patients, who seemed  
36  
37 unsure of where else to turn, used e-consultations to address issues that extended beyond the  
38  
39 scope of general practice:

40  
41 Now you can write to your doctor 24/7, and they have to answer. I mean, many things  
42  
43 end up here where I just think, “This has absolutely nothing to do with medical practice”.  
44  
45 But you can see that they don’t know where to ask their question, and you spend time on  
46  
47 it anyway.  
48  
49

## 50 **A new interaction space is accessible**

### 51 Patient perspective

52  
53  
54  
55 The non-physical shared contact space of e-consultations broke the traditional association  
56  
57

1  
2  
3 between social presence and physical proximity, creating a new form of mutual presence or co-  
4 access. For patients, e-consultations were perceived as facilitating new conversations with their  
5 GP, which gave them a sense of equanimity. Most patients found that they could ask their GP  
6 about anything in e-consultations including their worries and concerns. When asked if e-  
7 consultations would weaken their relationship with the GP because of its more formal framing  
8 and written form, one patient stated:  
9

10  
11  
12  
13  
14 Not at all, quite the opposite. [...] If you have it in writing, you can read it, and you can  
15 read it again, because you might have forgotten details. So, for me, it is an advantage [...]  
16 Because when talking, there might be something you can't remember because there are  
17 so many things [said], but that doesn't happen when you have it in writing.  
18  
19  
20  
21  
22

23 The written form meant that the patient could access and re-access the interaction space without  
24 the GP being present at the same time. For patients, this created a safe feeling, and it was highly  
25 valued by the patient that they could access a space that permanently documented their  
26 communication with their GP.  
27  
28  
29

30  
31  
32 Some patients emphasised that the access to their GPs facilitated by e-consultations promoted a  
33 straightforward form of communication:  
34

35  
36 Of course, we are emotional beings, but if we strip it [communication] of emotional talk,  
37 it is very concrete. Does my knee hurt or not? Can I stretch my leg or not? I mean, that is  
38 the way my brain works.  
39  
40  
41  
42

43 Others, on the other hand, liked writing personal and emotional messages to their GP, and found  
44 it easy to raise challenging topics by e-mail. E-consultations facilitated a new way of gathering  
45 one's thoughts, as this patient explained:  
46  
47

48 I thought that it must be possible to gather my thoughts in a different way [...]. When it  
49 became possible to write to them, I wrote, "Sleeping is not going well. I don't feel like  
50 taking the sleeping pills you gave me because I don't want to deal with the side effects.  
51 Are there other options?", and then I get a response. And it is always quick, and it is  
52 concrete. It is VERY concrete, and I am forced to think in a very concrete way.  
53  
54  
55  
56  
57  
58  
59  
60

## GP perspective

Regarding the co-access facilitated by e-consultations, many GPs stated that they appreciated e-consultation communication because of its brevity and precision. Compared to telephone consultations, e-consultations were perceived as compelling patients as well as GPs to communicate effectively: “What I really like about email is that it forces both parties to be brief and a little more precise”. Moreover, e-consultations were perceived by GPs as providing patients with the opportunity to reflect on their communication, resulting in more considered and constructive communication: “I think the strength of email is that when they ask me something, they have thought about what they want to ask about”.

E-consultations were also experienced by GPs as facilitating access to new forms of affective communication. For example, if patients were dissatisfied with their care, GPs deemed e-consultations to be a good medium for patients’ expression of critique:

If they are unsatisfied about something, they are afraid to say upfront... I have found that a couple of times you receive an email where they write and tell you what they are unsatisfied with. Then they have given it a lot of thought. [...] So, it is really good for that purpose, and it opens up possibilities.

Furthermore, GPs had found that e-consultations could facilitate emotional disclosure to a greater extent than face-to-face consultation. Patients were able to write to their GP in the moment of affect (e.g. anxiety, stress, anger and happiness), in the knowledge that the GP would respond at some point. Several examples were provided by the GPs of how their patients shared their feelings with them, e.g. if they were feeling miserable or better in the direct aftermath of a treatment or social gathering.

## Access to access

### Patient perspective

Compared to telephone and face-to-face consultations, patients found e-consultations to be easier, more direct and most importantly, untriaged. The patients did not meet a “gatekeeping

1  
2  
3 function” in the guise of a medical secretary or a nurse, nor did they experience delays in getting  
4 their message across. In that sense, e-consultations were perceived as a means of dealing with a  
5 situation directly. If a problem could not be solved via an e-consultation, e-consultations could  
6 expedite the booking of a clinical appointment. One patient described the improved access to  
7 their GP as follows: “Because I mean, you can't – after all, you don't come directly in contact  
8 with the doctor, it's through the nurses up there, right? [...] If I have to go to the doctor, I write.”  
9

10  
11  
12 Moreover, the patients stated that if GPs deemed the content of a patient's e-consultation  
13 message to be unclear or in other ways too complicated to answer directly, he/she typically  
14 recommended a physical consultation. Sometimes, GPs booked an appointment time and  
15 included information about it in the e-consultation response. In that way, patients perceived that  
16 they got access to access (face-to-face consultation) more quickly than if they phoned. One  
17 patient explained as follows:  
18  
19  
20  
21  
22  
23  
24  
25

26  
27 I just wrote to him, and I got an appointment. And it was easier to get an appointment  
28 directly with him than it is if you book online because then it is several months away. I  
29 got an appointment the next day every time.  
30  
31  
32  
33

34 Another patient emphasized the usefulness of getting their GP's initial assessment of a situation  
35 via e-consultations:  
36  
37  
38

39 And that is also okay, because then they can judge “There must be something, let's get  
40 her down here and look at it”. If they had judged “That is nothing”, then they would just  
41 write “You don't have to worry about that”.  
42  
43  
44  
45

46 Thus, after the e-consultation, the patient knew if the GP considered a physical consultation to be  
47 necessary.  
48  
49  
50

## 51 GP perspective

52 Reflecting patients' experiences of how e-consultations facilitated quick access to access, the  
53 GPs discussed how patients used e-consultations as a way of bypassing waiting lists: “Because  
54  
55  
56  
57  
58  
59  
60

1  
2  
3 sometimes, it is because they want to squeeze themselves in because they can't get an  
4 appointment.”  
5

6  
7 Furthermore, GPs described how e-consultations were used by some patients to “test the water”,  
8 checking with their GP whether their health problem elicited a “wait and see” or “book an  
9 appointment immediately” response:  
10  
11

12  
13 Sometimes, someone asks about a certain issue, “Do I need an appointment?” And it can  
14 be anything from giving them advice and saying, “You can just wait and see” or “You  
15 need an acute appointment for that – you should call and get one today”.  
16  
17

18  
19 According to some GPs, these kinds of e-consultations could be redundant or wasteful as they  
20 would very often elicit responses of the type: “We need to see you, you have to come in”,  
21 meaning “What you are presenting, we can't deal with via email”; one GP estimated that they  
22 redirected “one third” of their e-consultations to face-to-face consultations. However, in other  
23 cases, e-consultations could increase effectiveness: “There are definitely some where we say,  
24 “You don't need to come in, you will get a prescription”. Like, threadworms, I don't need to see  
25 that.”  
26  
27  
28  
29  
30  
31  
32  
33

## 34 **DISCUSSION AND CONCLUSION**

### 35 **Discussion**

36  
37 In this article, we explored a large qualitative data set of interviews to investigate GPs' and  
38 patients' perspectives on the communicative advantages and disadvantages of e-consultations as  
39 a medium for accessing each other. We drew on a media-theoretical framework, focusing on the  
40 concept of affordances, as we wanted to shed light on what the *medium* meant for perceived  
41 communicative advantages and disadvantages of this still relatively new form of patient-doctor  
42 consultation. Three affordances were evident in the subsets of data on doctors' and patients'  
43 perspectives: e-consultations were associated with a *lower contact threshold*, the availability of a  
44 *new interaction space*, and *access to access*. These affordances are important as they say  
45 something about the primary characteristics of e-consultations as interpreted by their users.  
46  
47 These affordances may also be relevant for other forms of e-mediated communication in  
48  
49  
50  
51  
52  
53  
54  
55  
56  
57  
58  
59  
60

1  
2  
3 healthcare such as doctor-patient online forums; however, further studies would be required to  
4 explore this.  
5  
6

7  
8 Many of our findings on GPs' and patients' perspectives on e-consultation communication  
9 resonate with those of previous studies. Patients in our study appreciated the lower contact  
10 threshold to their GPs. Similarly, in previous research, patients liked being able to contact their  
11 GPs from the convenience of their own homes at times that suited them<sup>2 31</sup>.  
12  
13  
14

15  
16 Similar to other studies<sup>32-34</sup>, patients in our study welcomed having time in e-consultations to  
17 reflect over their accounts of their health concerns. In our data, patients' and GPs' appreciation  
18 of the brief, matter-of-fact communication of e-consultations reflects the leanness associated  
19 with the medium of e-mail<sup>35</sup>. However, we also found that e-consultations make it easier for  
20 patients to write than talk about sensitive or emotional topics, suggest their own hypotheses for  
21 discussion, and ask questions, which resonates with previous findings<sup>31 36-39</sup>. Moreover, in  
22 previous research, doctors have reported that when used appropriately for relatively  
23 straightforward tasks (e.g. prescription refills and information sharing regarding medication or  
24 treatments), e-consultations can impact the doctor-patient relationship positively and improve  
25 continuity of care<sup>40 41</sup>. Patients in our study anticipated that the time used on e-consultations may  
26 mean more time for consultations in the clinic.  
27  
28  
29  
30  
31  
32  
33  
34  
35  
36

37  
38 Doctors have voiced their concerns about the potentially negative effects of e-consultations on  
39 workload, compensation and litigation<sup>7 42</sup> and that e-consultations grant patients untriaged  
40 access<sup>41</sup>. We found similar results in our data related to GPs' concerns about access to access,  
41 whereas patients were pleased about untriaged access to their GPs.  
42  
43  
44  
45

46  
47 What our article offers with respect to previous studies is a framework for interpreting doctors'  
48 and patients' perspectives that links to the medium of e-consultations. The findings presented in  
49 this article are therefore not "just" advantages and disadvantages of e-consultations; rather, they  
50 represent advantages and disadvantages of perceived affordances of the medium of e-  
51 consultations, i.e. e-mail. The lack of a concerted medium-based focus in previous research on e-  
52 consultations misses the critical aspect of e-consultations as occurring in a different medium to  
53  
54  
55  
56  
57  
58  
59  
60



1  
2  
3 the clinical dyad. As we have shown in our article, e-consultations permit access that is de-  
4 coupled from time and space which significantly impacts the communication that is possible  
5 between patients and doctors.  
6  
7

8  
9  
10 A strength of our study is the theoretical framework that draws on affordance theory coupled  
11 with a qualitative approach that involves deductive and inductive approaches; we suggest that  
12 this could be useful for other studies exploring emerging communicative practices that use new  
13 media in healthcare settings. Besides our theoretical approach, other strengths of this study  
14 include the use of interviews to investigate perspectives on e-consultations and a large data set.  
15 In addition, we see it as very valuable that the perspectives of both GPs and patients are  
16 included.  
17  
18  
19  
20  
21  
22  
23

24 A limitation of the study is that the majority of patients represented were born in 1954 or earlier  
25 (> 65 years) which might influence the results. Moreover, there is a need for further studies in  
26 different countries as our findings are likely to be inflected by the local Danish context (e.g. the  
27 triage system may operate differently). Finally, we also need to highlight the likelihood that as  
28 our patient interviewees were those who chose to use e-consultations, they may be quite  
29 technology-savvy and thus not be representative of the general population.  
30  
31  
32  
33  
34  
35  
36

### 37 **Conclusion**

38  
39 This study adds knowledge of how the affordances of the medium of e-consultation may impact  
40 access in doctor-patient communication. Communication may not only be more frequent (lower  
41 contact threshold), it may also give rise to very different communicative practices as witnessed  
42 by the affordances of the availability of a new interaction space. Moreover, e-consultations  
43 facilitate access to access as patients have a new means of gaining face-to-face access to their  
44 GPs. E-consultations thus do not simply extend existing forms of contact and consultation (face-  
45 to-face and telephone); they produce a new communication space with its own affordances  
46 which result in new practices. With increasing use of e-consultations, it is important to be alert to  
47 the possibility that e-consultations may involve new roles for patients and GPs, and that there  
48 may be challenges involved in transferring some GP-patient communication to the written  
49  
50  
51  
52  
53  
54  
55  
56  
57  
58  
59  
60

1  
2  
3 medium. To keep pace with such developments, we argue, like Schiller<sup>43</sup>, that the knowledge  
4 and skill sets that could help manage the communicative demands of e-consultations should be  
5 reflected in doctors' education. Also, at policy level, there should be greater awareness that e-  
6 consultations may add extra tasks to GPs, as although e-consultations have been promoted to  
7 improve effectiveness in healthcare systems, they may increase work strain on GPs.  
8  
9  
10  
11

### 12 **Acknowledgements**

13  
14  
15  
16 We would like to thank all the patients and the GPs who participated in our study. We would  
17 also like to thank student assistant Karoline Søberg for all her administrative help.  
18  
19  
20

### 21 **Contributors**

22  
23  
24 All authors were involved in the conception and design of the study. The interviews were  
25 conducted by AG and EAH. All authors were involved in the analysis and interpretation of data  
26 for the study as well as the drafting and revision of the article.  
27  
28  
29  
30

### 31 **Funding**

32  
33  
34 The present study was supported by a grant from the VELUX FOUNDATIONS [grant number  
35 18158], and an AUFF Starting Grant [AUFF-E-2015-FLS-7-30].  
36  
37  
38

### 39 **Competing Interests**

40  
41 None declared.  
42  
43

### 44 **Patient consent for publication**

45  
46 Not required.  
47  
48

### 49 **Ethics approval**

50  
51 The study was approved by the institutional review board of the University of Southern  
52 Denmark, the Research and Innovation Organization (RIO) (Journal no. 10457) and was  
53 conducted in accordance with the GDPR and Declaration of Helsinki<sup>44</sup>.  
54  
55  
56  
57  
58  
59  
60

## Data sharing statement

We do not have ethics approval to share raw data from our interviews.

## References

1. Andreassen HK. What does an e-mail address add?-Doing health and technology at home. *Social science & medicine* 2011;72(4):521-28.
2. Ball MJ, Lillis J. E-health: transforming the physician/patient relationship. *International journal of medical informatics* 2001;61(1):1-10.
3. Recupero PR. E-mail and the psychiatrist-patient relationship. *Journal of the American Academy of Psychiatry and the Law Online* 2005;33(4):465-75.
4. Ye J, Rust G, Fry-Johnson Y, et al. E-mail in patient-provider communication: A systematic review. *Patient education and counseling* 2010;80(2):266-73.
5. Newhouse N, Lupiáñez-Villanueva F, Codagnone C, et al. Patient use of email for health care communication purposes across 14 European countries: an analysis of users according to demographic and health-related factors. *Journal of medical internet research* 2015;17(3):e58.
6. Huygens MW, Swinkels IC, Verheij RA, et al. Understanding the use of email consultation in primary care using a retrospective observational study with data of Dutch electronic health records. *BMJ open* 2018;8(1):e019233.
7. Fage - Butler AM, Nisbeth Jensen M. Medical terminology in online patient - patient communication: evidence of high health literacy? *Health Expectations* 2016;19(3):643-53.
8. Seier K. Praktiserende læger har flere patienter end nogensinde før [GPs have more patients than ever before] 2018 [updated 28.08.2018. Available from: <https://www.dr.dk/nyheder/regionale/nordjylland/praktiserende-laeger-har-flere-patienter-end-nogensinde-foer> (accessed 31 Jan 2020)
9. Kert K, Flach AS. Kø i venteværelset: Antallet af patienter per læge har aldrig været så højt [Queue in the waiting room: The number of patients per doctor has never been so high] 2019 [updated 16.01.2019. Available from: <https://www.dr.dk/nyheder/regionale/hovedstadsomraadet/koe-i-ventevaerelset-antallet-af-patienter-laege-har-aldrig> (accessed 31 Jan 2020)
10. Gillespie R. Architecture and power: a family planning clinic as a case study. *Health & place* 2002;8(3):211-20.
11. Martin D, Nettleton S, Buse C, et al. Architecture and health care: a place for sociology. *Sociology of health & illness* 2015;37(7):1007-22.
12. Lupton D. *Medicine as Culture: Illness, disease and the body*. London: Sage 2012.
13. Fagerlund AJ, Holm IM, Zanaboni P. General practitioners' perceptions towards the use of digital health services for citizens in primary care: a qualitative interview study. *BMJ open* 2019;9(5):e028251.
14. PLO. Praktiserende Lægers Organisation [The Danish Organization of General Practitioners]. Lægernes overenskomst om almen praksis [Doctor's agreement], 2010.
15. PLO. Praktiserende Lægers Organisation [The Danish Organization of General Practitioners]. Aktivitet og økonomi i almen praksis i dagtid og vagttid 2007 til 2017. [Activity and economy in General Practice 2007-2017]. 2018 [Available from: [https://www.laeger.dk/sites/default/files/aktivitet\\_og\\_oekonomi\\_i\\_almen\\_praksis\\_2006-2016.pdf](https://www.laeger.dk/sites/default/files/aktivitet_og_oekonomi_i_almen_praksis_2006-2016.pdf) (accessed 11 Feb 2020)
16. Meyrowitz J. *No sense of place: The impact of electronic media on social behavior*. Oxford: Oxford University Press 1986.

17. Gibson JJ. The theory of affordances. In: Shaw R, Bransford J, eds. *Perceiving, acting and knowing: Toward an ecological psychology*. Hillsdale, New Jersey: Lawrence Erlbaum Associates 1977.
18. Gibson JJ. *The Ecological Approach to Perception*. London: Houghton Mifflin 1979.
19. Norman D. *The design of everyday things*. London: MIT Press 1990.
20. Hutchby I. Technologies, texts and affordances. *Sociology* 2001;35(2):441-56.
21. Majchrzak A, Markus ML. Technology affordances and constraints in management information systems (MIS). *Encyclopedia of Management Theory*, (Ed: E Kessler), Sage Publications, Forthcoming 2012
22. Grønning A. *Digitale samtaler*. Frederiksberg: Samfundslitteratur 2018.
23. Vaast E, Kaganer E. Social media affordances and governance in the workplace: An examination of organizational policies. *Journal of computer-mediated communication* 2013;19(1):78-101.
24. Fayard A-L, Weeks J. Who Moved My Cube? *Harvard Business Review* 2011;89(7/8):102-10.
25. Leonardi PM. When flexible routines meet flexible technologies: Affordance, constraint, and the imbrication of human and material agencies. *MIS quarterly* 2011:147-67.
26. Leonardi PM, Barley SR. What's under construction here? Social action, materiality, and power in constructivist studies of technology and organizing. *Academy of Management Annals* 2010;4(1):1-51.
27. Markus ML, Silver MS. A foundation for the study of IT effects: A new look at DeSanctis and Poole's concepts of structural features and spirit. *Journal of the Association for Information systems* 2008;9(10):5.
28. Grønning A. *Personen bag: Tilstedevær i e-mail som interaktionsform mellem kunde og medarbejder i dansk forsikringskontekst*. København: Samfundslitteratur 2006.
29. Malterud K, Siersma VD, Guassora AD. Sample size in qualitative interview studies: guided by information power. *Qualitative health research* 2016;26(13):1753-60.
30. Kozinets RV. Netnography. *The international encyclopedia of digital communication and society* 2015:1-8.
31. Baur C. Limiting factors on the transformative powers of e-mail in patient-physician relationships: a critical analysis. *Health communication* 2000;12(3):239-59.
32. Atherton H, Pappas Y, Heneghan C, et al. Experiences of using email for general practice consultations: a qualitative study. *Br J Gen Pract* 2013;63(616):e760-e67.
33. Hansen CS, Christensen KL, Ertmann R. Patients and general practitioners have different approaches to e-mail consultations. *Dan Med J* 2014;61(6):A4863.
34. Hartgers M, Jatoi A. E-Mail and photographs: A case report of a patient-initiated diagnostic tool in the era of electronic communication. *Journal of palliative medicine* 2010;13(3):335-37.
35. Rethinking media richness: Towards a theory of media synchronicity. Proceedings of the 32nd Annual Hawaii International Conference on Systems Sciences 1999 HICSS-32 Abstracts and CD-ROM of Full Papers; 1999. IEEE.
36. Lee SA, Zuercher RJ. A current review of doctor-patient computer-mediated communication. *Journal of Communication in Healthcare* 2017;10(1):22-30.
37. Roter DL, Larson S, Sands DZ, et al. Can e-mail messages between patients and physicians be patient-centered? *Health communication* 2008;23(1):80-86.
38. Tjora A, Tran T, Faxvaag A. Privacy vs usability: a qualitative exploration of patients' experiences with secure Internet communication with their general practitioner. *Journal of Medical Internet Research* 2005;7(2):e15.
39. Zandbelt LC, de Kanter FE, Ubbink DT. E-consulting in a medical specialist setting: Medicine of the future? *Patient education and counseling* 2016;99(5):689-705.

- 1  
2  
3 40. Moyer CA, Stern DT, Dobias KS, et al. Bridging the electronic divide: patient and provider  
4 perspectives on e-mail communication in primary care. *The American journal of managed care*  
5 2002;8(5):427-33.  
6  
7 41. Patt MR, Houston TK, Jenckes MW, et al. Doctors who are using e-mail with their patients: a  
8 qualitative exploration. *Journal of Medical Internet Research* 2003;5(2):e9.  
9  
10 42. Car J, Sheikh A. Email consultations in health care: 2—acceptability and safe application. *Bmj*  
11 2004;329(7463):439-42.  
12  
13 43. Schiller JH, Christner JG, Stansfield RB, et al. What parents want from emails with their pediatrician:  
14 Implications for teaching communication skills. *Patient education and counseling* 2013;92(1):61-  
15 66.  
16  
17 44. Association WM. Ethical principles for medical research involving human subjects. *Journal of the*  
18 *American Medical Association* 2013;310(20):2191-94.  
19  
20  
21  
22  
23  
24  
25  
26  
27  
28  
29  
30  
31  
32  
33  
34  
35  
36  
37  
38  
39  
40  
41  
42  
43  
44  
45  
46  
47  
48  
49  
50  
51  
52  
53  
54  
55  
56  
57  
58  
59  
60

| Interviews                 | Number of participants | Gender    |           | Age span |
|----------------------------|------------------------|-----------|-----------|----------|
|                            |                        | Female    | Male      |          |
| Patients                   | 30                     | 18        | 12        | 40-91    |
| GPs                        | 23                     | 12        | 11        | 37-70    |
| <b>Participants, total</b> | <b>53</b>              | <b>30</b> | <b>23</b> |          |

**Table 1: Overview of interviews**

# Reporting checklist for qualitative study.

Based on the SRQR guidelines.

## Instructions to authors

Complete this checklist by entering the page numbers from your manuscript where readers will find each of the items listed below.

Your article may not currently address all the items on the checklist. Please modify your text to include the missing information. If you are certain that an item does not apply, please write "n/a" and provide a short explanation.

Upload your completed checklist as an extra file when you submit to a journal.

In your methods section, say that you used the SRQR reporting guidelines, and cite them as:

O'Brien BC, Harris IB, Beckman TJ, Reed DA, Cook DA. Standards for reporting qualitative research: a synthesis of recommendations. Acad Med. 2014;89(9):1245-1251.

|              |                                                                                                                                                                                                                                                                | Page   |
|--------------|----------------------------------------------------------------------------------------------------------------------------------------------------------------------------------------------------------------------------------------------------------------|--------|
|              | Reporting Item                                                                                                                                                                                                                                                 | Number |
| <b>Title</b> | <p><a href="#">#1</a> Concise description of the nature and topic of the study identifying the study as qualitative or indicating the approach (e.g. ethnography, grounded theory) or data collection methods (e.g. interview, focus group) is recommended</p> | 1      |

## Abstract

[#2](#) Summary of the key elements of the study using the abstract format of the intended publication; typically includes background, purpose, methods, results and conclusions

## Introduction

Problem formulation [#3](#) Description and significance of the problem / phenomenon studied: review of relevant theory and empirical work; problem statement

Purpose or research question [#4](#) Purpose of the study and specific objectives or questions

## Methods

Qualitative approach and research paradigm [#5](#) Qualitative approach (e.g. ethnography, grounded theory, case study, phenomenology, narrative research) and guiding theory if appropriate; identifying the research paradigm (e.g. postpositivist, constructivist / interpretivist) is also recommended; rationale. The rationale should briefly discuss the justification for choosing that theory, approach, method or technique rather than other options available; the assumptions and limitations implicit in those choices and how those choices influence study conclusions and transferability.



As appropriate the rationale for several items might be discussed together.

|    |                           |                     |                                                           |
|----|---------------------------|---------------------|-----------------------------------------------------------|
| 1  |                           |                     |                                                           |
| 2  |                           |                     |                                                           |
| 3  |                           |                     |                                                           |
| 4  |                           |                     |                                                           |
| 5  |                           |                     |                                                           |
| 6  | Researcher                | <a href="#">#6</a>  | Researchers' characteristics that may influence the       |
| 7  |                           |                     |                                                           |
| 8  | characteristics and       |                     | research, including personal attributes, qualifications / |
| 9  |                           |                     |                                                           |
| 10 | reflexivity               |                     | experience, relationship with participants, assumptions   |
| 11 |                           |                     | and / or presuppositions; potential or actual interaction |
| 12 |                           |                     | between researchers' characteristics and the research     |
| 13 |                           |                     | questions, approach, methods, results and / or            |
| 14 |                           |                     | transferability                                           |
| 15 |                           |                     |                                                           |
| 16 |                           |                     |                                                           |
| 17 |                           |                     |                                                           |
| 18 |                           |                     |                                                           |
| 19 |                           |                     |                                                           |
| 20 |                           |                     |                                                           |
| 21 |                           |                     |                                                           |
| 22 | Context                   | <a href="#">#7</a>  | Setting / site and salient contextual factors; rationale  |
| 23 |                           |                     |                                                           |
| 24 |                           |                     |                                                           |
| 25 | Sampling strategy         | <a href="#">#8</a>  | How and why research participants, documents, or          |
| 26 |                           |                     |                                                           |
| 27 |                           |                     | events were selected; criteria for deciding when no       |
| 28 |                           |                     | further sampling was necessary (e.g. sampling             |
| 29 |                           |                     | saturation); rationale                                    |
| 30 |                           |                     |                                                           |
| 31 |                           |                     |                                                           |
| 32 |                           |                     |                                                           |
| 33 |                           |                     |                                                           |
| 34 |                           |                     |                                                           |
| 35 | Ethical issues pertaining | <a href="#">#9</a>  | Documentation of approval by an appropriate ethics        |
| 36 |                           |                     |                                                           |
| 37 | to human subjects         |                     | review board and participant consent, or explanation      |
| 38 |                           |                     | for lack thereof; other confidentiality and data security |
| 39 |                           |                     | issues                                                    |
| 40 |                           |                     |                                                           |
| 41 |                           |                     |                                                           |
| 42 |                           |                     |                                                           |
| 43 |                           |                     |                                                           |
| 44 |                           |                     |                                                           |
| 45 | Data collection methods   | <a href="#">#10</a> | Types of data collected; details of data collection       |
| 46 |                           |                     |                                                           |
| 47 |                           |                     | procedures including (as appropriate) start and stop      |
| 48 |                           |                     | dates of data collection and analysis, iterative process, |
| 49 |                           |                     | triangulation of sources / methods, and modification of   |
| 50 |                           |                     | procedures in response to evolving study findings;        |
| 51 |                           |                     | rationale                                                 |
| 52 |                           |                     |                                                           |
| 53 |                           |                     |                                                           |
| 54 |                           |                     |                                                           |
| 55 |                           |                     |                                                           |
| 56 |                           |                     |                                                           |
| 57 |                           |                     |                                                           |
| 58 |                           |                     |                                                           |
| 59 |                           |                     |                                                           |
| 60 |                           |                     |                                                           |

|    |                         |                     |                                                          |     |
|----|-------------------------|---------------------|----------------------------------------------------------|-----|
| 1  | Data collection         | <a href="#">#11</a> | Description of instruments (e.g. interview guides,       | 4-5 |
| 2  |                         |                     | questionnaires) and devices (e.g. audio recorders)       |     |
| 3  | instruments and         |                     | used for data collection; if / how the instruments(s)    |     |
| 4  |                         |                     | changed over the course of the study                     |     |
| 5  | technologies            |                     |                                                          |     |
| 6  |                         |                     |                                                          |     |
| 7  |                         |                     |                                                          |     |
| 8  |                         |                     |                                                          |     |
| 9  |                         |                     |                                                          |     |
| 10 |                         |                     |                                                          |     |
| 11 | Units of study          | <a href="#">#12</a> | Number and relevant characteristics of participants,     | 5   |
| 12 |                         |                     | documents, or events included in the study; level of     |     |
| 13 |                         |                     | participation (could be reported in results)             |     |
| 14 |                         |                     |                                                          |     |
| 15 |                         |                     |                                                          |     |
| 16 |                         |                     |                                                          |     |
| 17 |                         |                     |                                                          |     |
| 18 |                         |                     |                                                          |     |
| 19 | Data processing         | <a href="#">#13</a> | Methods for processing data prior to and during          | 5   |
| 20 |                         |                     | analysis, including transcription, data entry, data      |     |
| 21 |                         |                     | management and security, verification of data integrity, |     |
| 22 |                         |                     | data coding, and anonymisation / deidentification of     |     |
| 23 |                         |                     | excerpts                                                 |     |
| 24 |                         |                     |                                                          |     |
| 25 |                         |                     |                                                          |     |
| 26 |                         |                     |                                                          |     |
| 27 |                         |                     |                                                          |     |
| 28 |                         |                     |                                                          |     |
| 29 |                         |                     |                                                          |     |
| 30 |                         |                     |                                                          |     |
| 31 | Data analysis           | <a href="#">#14</a> | Process by which inferences, themes, etc. were           | 6   |
| 32 |                         |                     | identified and developed, including the researchers      |     |
| 33 |                         |                     | involved in data analysis; usually references a specific |     |
| 34 |                         |                     | paradigm or approach; rationale                          |     |
| 35 |                         |                     |                                                          |     |
| 36 |                         |                     |                                                          |     |
| 37 |                         |                     |                                                          |     |
| 38 |                         |                     |                                                          |     |
| 39 |                         |                     |                                                          |     |
| 40 |                         |                     |                                                          |     |
| 41 | Techniques to enhance   | <a href="#">#15</a> | Techniques to enhance trustworthiness and credibility    | -   |
| 42 |                         |                     | of data analysis (e.g. member checking, audit trail,     |     |
| 43 | trustworthiness         |                     | triangulation); rationale                                |     |
| 44 |                         |                     |                                                          |     |
| 45 |                         |                     |                                                          |     |
| 46 |                         |                     |                                                          |     |
| 47 |                         |                     |                                                          |     |
| 48 | <b>Results/findings</b> |                     |                                                          |     |
| 49 |                         |                     |                                                          |     |
| 50 |                         |                     |                                                          |     |
| 51 | Syntheses and           | <a href="#">#16</a> | Main findings (e.g. interpretations, inferences, and     | 6-  |
| 52 |                         |                     | themes); might include development of a theory or        |     |
| 53 | interpretation          |                     | model, or integration with prior research or theory      |     |
| 54 |                         |                     |                                                          |     |
| 55 |                         |                     |                                                          |     |
| 56 |                         |                     |                                                          |     |
| 57 |                         |                     |                                                          |     |
| 58 |                         |                     |                                                          |     |
| 59 |                         |                     |                                                          |     |
| 60 |                         |                     |                                                          |     |

|    |                              |                     |                                                          |    |
|----|------------------------------|---------------------|----------------------------------------------------------|----|
| 1  | Links to empirical data      | <a href="#">#17</a> | Evidence (e.g. quotes, field notes, text excerpts,       | 6- |
| 2  |                              |                     | photographs) to substantiate analytic findings           |    |
| 3  |                              |                     |                                                          |    |
| 4  |                              |                     |                                                          |    |
| 5  |                              |                     |                                                          |    |
| 6  | <b>Discussion</b>            |                     |                                                          |    |
| 7  |                              |                     |                                                          |    |
| 8  |                              |                     |                                                          |    |
| 9  |                              |                     |                                                          |    |
| 10 | Intergration with prior      | <a href="#">#18</a> | Short summary of main findings; explanation of how       | 12 |
| 11 | work, implications,          |                     | findings and conclusions connect to, support, elaborate  |    |
| 12 |                              |                     | on, or challenge conclusions of earlier scholarship;     |    |
| 13 | transferability and          |                     | discussion of scope of application / generalizability;   |    |
| 14 |                              |                     | identification of unique contributions(s) to scholarship |    |
| 15 | contribution(s) to the field |                     | in a discipline or field                                 |    |
| 16 |                              |                     |                                                          |    |
| 17 |                              |                     |                                                          |    |
| 18 |                              |                     |                                                          |    |
| 19 |                              |                     |                                                          |    |
| 20 |                              |                     |                                                          |    |
| 21 |                              |                     |                                                          |    |
| 22 |                              |                     |                                                          |    |
| 23 |                              |                     |                                                          |    |
| 24 | Limitations                  | <a href="#">#19</a> | Trustworthiness and limitations of findings              | 14 |
| 25 |                              |                     |                                                          |    |
| 26 |                              |                     |                                                          |    |
| 27 | <b>Other</b>                 |                     |                                                          |    |
| 28 |                              |                     |                                                          |    |
| 29 |                              |                     |                                                          |    |
| 30 | Conflicts of interest        | <a href="#">#20</a> | Potential sources of influence of perceived influence on | 15 |
| 31 |                              |                     | study conduct and conclusions; how these were            |    |
| 32 |                              |                     | managed                                                  |    |
| 33 |                              |                     |                                                          |    |
| 34 |                              |                     |                                                          |    |
| 35 |                              |                     |                                                          |    |
| 36 |                              |                     |                                                          |    |
| 37 |                              |                     |                                                          |    |
| 38 | Funding                      | <a href="#">#21</a> | Sources of funding and other support; role of funders in | 15 |
| 39 |                              |                     | data collection, interpretation and reporting            |    |
| 40 |                              |                     |                                                          |    |
| 41 |                              |                     |                                                          |    |
| 42 |                              |                     |                                                          |    |

None The SRQR checklist is distributed with permission of Wolters Kluwer © 2014 by the Association of American Medical Colleges. This checklist can be completed online using <https://www.goodreports.org/>, a tool made by the [EQUATOR Network](#) in collaboration with [Penelope.ai](#)

# BMJ Open

## How do patients and general practitioners in Denmark perceive the communicative advantages and disadvantages of access via email consultations? A media-theoretical qualitative study

|                                 |                                                                                                                                                                                                                                                                                                                                                                                 |
|---------------------------------|---------------------------------------------------------------------------------------------------------------------------------------------------------------------------------------------------------------------------------------------------------------------------------------------------------------------------------------------------------------------------------|
| Journal:                        | <i>BMJ Open</i>                                                                                                                                                                                                                                                                                                                                                                 |
| Manuscript ID                   | bmjopen-2020-039442.R1                                                                                                                                                                                                                                                                                                                                                          |
| Article Type:                   | Original research                                                                                                                                                                                                                                                                                                                                                               |
| Date Submitted by the Author:   | 11-Aug-2020                                                                                                                                                                                                                                                                                                                                                                     |
| Complete List of Authors:       | Grønning, Anette; University of Southern Denmark, Department for the Study of Culture<br>Assing Hvidt, Elisabeth; University of Southern Denmark, Research Unit of General Practice, Department of Public Health<br>Brøgger, Matilde; Aarhus University, School of Communication and Culture<br>Fage-Butler, Antoinette; Aarhus University, School of Communication and Culture |
| <b>Primary Subject Heading</b>: | General practice / Family practice                                                                                                                                                                                                                                                                                                                                              |
| Secondary Subject Heading:      | Communication, General practice / Family practice, Qualitative research                                                                                                                                                                                                                                                                                                         |
| Keywords:                       | QUALITATIVE RESEARCH, PRIMARY CARE, Telemedicine < BIOTECHNOLOGY & BIOINFORMATICS                                                                                                                                                                                                                                                                                               |
|                                 |                                                                                                                                                                                                                                                                                                                                                                                 |

SCHOLARONE™  
Manuscripts



I, the Submitting Author has the right to grant and does grant on behalf of all authors of the Work (as defined in the below author licence), an exclusive licence and/or a non-exclusive licence for contributions from authors who are: i) UK Crown employees; ii) where BMJ has agreed a CC-BY licence shall apply, and/or iii) in accordance with the terms applicable for US Federal Government officers or employees acting as part of their official duties; on a worldwide, perpetual, irrevocable, royalty-free basis to BMJ Publishing Group Ltd ("BMJ") its licensees and where the relevant Journal is co-owned by BMJ to the co-owners of the Journal, to publish the Work in this journal and any other BMJ products and to exploit all rights, as set out in our [licence](#).

The Submitting Author accepts and understands that any supply made under these terms is made by BMJ to the Submitting Author unless you are acting as an employee on behalf of your employer or a postgraduate student of an affiliated institution which is paying any applicable article publishing charge ("APC") for Open Access articles. Where the Submitting Author wishes to make the Work available on an Open Access basis (and intends to pay the relevant APC), the terms of reuse of such Open Access shall be governed by a Creative Commons licence – details of these licences and which [Creative Commons](#) licence will apply to this Work are set out in our licence referred to above.

Other than as permitted in any relevant BMJ Author's Self Archiving Policies, I confirm this Work has not been accepted for publication elsewhere, is not being considered for publication elsewhere and does not duplicate material already published. I confirm all authors consent to publication of this Work and authorise the granting of this licence.

1  
2  
3 **TITLE PAGE**  
4

5 **How do patients and general practitioners in Denmark perceive the communicative**  
6 **advantages and disadvantages of access via email consultations? A media-theoretical**  
7 **qualitative study**  
8  
9

10  
11 Anette Grønning<sup>1</sup>, Elisabeth Assing Hvidt<sup>1,2</sup>, Matilde Nisbeth Brøgger<sup>3</sup> & Antoinette Fage-  
12 Butler<sup>3</sup>  
13  
14

15  
16  
17  
18 <sup>1</sup> Department for the Study of Culture, University of Southern Denmark, Campusvej 55, 5230  
19 Odense M, Denmark. [ahg@sdu.dk](mailto:ahg@sdu.dk)  
20  
21

22  
23 <sup>2</sup> Research Unit of General Practice, Department of Public Health, University of Southern  
24 Denmark, J.B. Winsløws Vej 9A, 5000 Odense C, Denmark. [ehvidt@health.sdu.dk](mailto:ehvidt@health.sdu.dk)  
25  
26

27  
28 <sup>3</sup> School of Communication and Culture, Aarhus University, Jens Chr. Skous Vej 4, 8000 Aarhus  
29 C, Denmark. [matnj@cc.au.dk](mailto:matnj@cc.au.dk) & [fage-butler@cc.au.dk](mailto:fage-butler@cc.au.dk)  
30  
31

32  
33 ---  
34  
35

36 **Corresponding author:** Anette Grønning, Department for the Study of Culture, University of  
37 Southern Denmark, Campusvej 55, 5230 Odense M, Denmark. [ahg@sdu.dk](mailto:ahg@sdu.dk), +45 6550 4039  
38  
39  
40  
41  
42  
43  
44  
45  
46

47 **Word Count:** 4319 words.  
48  
49  
50  
51  
52  
53  
54  
55  
56  
57  
58  
59  
60

## ABSTRACT

**Objective:** Email consultations have become part of everyday doctor-patient communication in many countries. The objective of this study is to investigate how patients and general practitioners (GPs) perceive the communicative advantages and disadvantages of access via email consultation drawing on a media-theoretical perspective.

**Design:** We analysed qualitative interview data from general practices in Denmark to identify salient themes.

**Participants:** Our data set consists of semi-structured interviews with 30 patients and 23 GPs. The data were collected from February 2016 to September 2019.

**Results:** The following themes emerged: 1) lower contact threshold, 2) accessing a new interaction space and 3) access to access. From the patients' perspective, email consultations provided more convenient contact with their GP. From the GPs' perspective, email consultations facilitated contact with patients whom they otherwise rarely saw, but also resulted in overuse and inappropriate use. Patients and GPs considered email consultations as inviting new interactions, facilitating also communication about emotional and sensitive issues. Both patients and GPs experienced email consultations as a way in which patients could achieve easier access to face-to-face consultations (access to access).

**Conclusion:** Drawing on a media perspective, this study adds knowledge of how the potentials of the medium of email consultations are perceived by GPs and patients. Email consultations do not simply extend existing forms of contact and consultation (face-to-face and telephone); they produce a new communication space with its own possibilities which result in new practices. With increasing use of email consultations, there may be challenges involved in transferring GP-patient communication to the written medium.

### Keywords

Email consultation, access, communicative advantages and disadvantages, affordances, Denmark, email, general practice, computer-mediated communication

## Article Summary

### Strengths and limitations of this study

- The theoretical framework that draws on affordance theory is useful for other studies exploring emerging communicative practices that use new media in healthcare settings.
- The use of interviews to investigate perspectives on email consultations and the large data set are strengths of the study.
- In addition, it is a strength that the perspectives of both GPs and patients are represented.
- A potential limitation is that the majority of patients interviewed were born in 1954 or earlier (65+ years), but they were included as they participate in email consultations with the highest frequency in Denmark.

## INTRODUCTION

Email consultations are online consultations that allow general practitioners (GPs) and patients to communicate via e-mail without requiring their physical and/or temporal co-presence<sup>1-4</sup>. Email consultations, which are intended to supplement rather than replace the dyadic encounter in the clinical setting, take place through closed messaging systems that encrypt the exchanges and integrate them into patients' medical records. Uptake of this relatively new form of consultation is contingent on aspects such as political will, technical infrastructures, and the motivation and resources of GPs and patients<sup>4 5</sup>. The use of email consultations by patients varies considerably among general practices when it comes to frequency and purpose<sup>6</sup>.

A literature review on patients' perspectives on email consultations<sup>7</sup> found that patients identified greater access to their GPs as one of email consultations' main advantages. Patient access to healthcare is highly topical as aging populations mean that healthcare systems often strain to meet the growing demand for healthcare<sup>8</sup>. GPs in the Danish context, which is our present concern, are required to see increasing numbers of patients<sup>9</sup>, and Danish patients often struggle to see their GPs at the clinic due to GPs' heavily booked schedules<sup>10</sup>. A sense of inaccessibility may be exacerbated by spatial and physical aspects of the clinical setting, as access is mediated by the gatekeeping role of secretaries, having to wait in a waiting room and the length of the consultation, including GPs' own (need for) time management<sup>11-13</sup>. Commonly reported advantages for GPs include reduced phone load and increased efficiency in administration<sup>14</sup>.



1  
2  
3 In Denmark, general practice serves as a first-contact access point to the fully tax-financed  
4 Danish healthcare system that offers almost all services free of charge to citizens. In 2009, a  
5 collective agreement made it mandatory for all Danish GPs to offer email consultations to  
6 “increase efficiency and quality through the digitisation of health care”<sup>15</sup>. Email consultations  
7 were introduced as a cost-effective, convenient means of providing access to GPs, primarily for  
8 communication of test results and short questions that could be answered briefly and resolved  
9 without the patient being present. In Denmark, email consultation use has increased steadily  
10 since its introduction. A recent study found that Denmark had the highest numbers of doctor-  
11 patient emails sent/received in Europe<sup>5</sup>, making it a forerunner in the adoption of email  
12 consultations and thus an important case to investigate. By 2019, the number of email  
13 consultations in Denmark had risen from 1.3 million in 2008 to 7.2 million per year,  
14 corresponding to just under 21% of all GP consultations<sup>16</sup>.

15  
16  
17  
18  
19  
20  
21  
22  
23  
24  
25  
26 Currently, six different software systems (websites and apps) are used in Danish GP clinics to  
27 manage email consultations. Clinics decide on which system to use, the amount of text that  
28 patients can produce and whether pictures can be uploaded. The potential for patients having  
29 greater access to GPs is underlined on the websites of Danish GP practices; patients are, for  
30 example, told that they can use email consultations to contact their GP “24/7” and “day and  
31 night”, emphasizing the possibility of round-the-clock, direct, and patient-instigated access to  
32 GPs.  
33  
34  
35  
36  
37  
38

39  
40  
41 Against this backdrop, we address the following research question: *How do patients and GPs in*  
42 *the Danish setting perceive the communicative advantages and disadvantages of the access that*  
43 *the medium of email consultation provides?* We explore both patients’ and GPs’ perspectives in  
44 order to achieve a fuller understanding of the implications of email consultations for doctor-  
45 patient communication, and address the research question using qualitative interview data.  
46  
47  
48

49  
50  
51 The theoretical frame that guides our analysis derives from medium theory, a perspective that  
52 focuses on the potential impact of media *per se* beyond the content content that they convey<sup>17</sup>.  
53 We interpret email consultations as involving a communication *medium* that facilitates access  
54 between patients and GPs. Communication and media scholars refer to a medium’s  
55 “affordances”, meaning the different ways in which users employ a medium<sup>18 19</sup> and how a  
56  
57  
58  
59  
60

medium's possibilities are perceived by its users<sup>20</sup>. The concept of affordance helps us identify the limitations and strengths of the medium's materiality, i.e. physical properties that have consequences for how the medium is used (including what we conceive of a medium)<sup>21</sup>, also referred to as its affordances or *action potentials*<sup>22</sup>. Action potentials point both to the environment and to the observer and should not be studied purely objectively in terms of technical aspects or purely subjectively in terms of users' perspectives; instead, they are best considered as an interplay between humans and technology<sup>23</sup> that enhance our understanding of how technology is applied and perceived<sup>24-28</sup>. More specifically, one recognised action potential of e-mails is asynchronous production<sup>23 29</sup>, i.e. the possibility of planning, producing, sending and reading digital messages without the presence of the other participant(s) in the communication. Using e-mail can be perceived differently depending on factors such as user expectations and context. In order to understand how the affordances of asynchronous production shape the interplay between technology and users, interview data are thus highly appropriate.

## METHOD

This paper draws from a larger qualitative study of email consultations in general practice. The project includes five subprojects that each address key aspects of email consultations: technology, content and relations. The larger project involves a focused empirical analysis of email consultations and perceptions of such consultations from different theoretical perspectives.

### Data collection

The data set we analyse in this article consists of semi-structured interviews with 30 patients and 23 GPs. The data were collected from February 2016 to September 2019. See Table 1 for an overview of the interview participants.

| Interviews | Number of participants | Gender |      | Age span |
|------------|------------------------|--------|------|----------|
|            |                        | Female | Male |          |
| Patients   | 30                     | 18     | 12   | 40-91    |

|                            |           |           |           |       |
|----------------------------|-----------|-----------|-----------|-------|
|                            |           |           |           |       |
| GPs                        | 23        | 12        | 11        | 37-70 |
| <b>Participants, total</b> | <b>53</b> | <b>30</b> | <b>23</b> |       |

**Table 1: Overview of interviews**

30 patients (18 women and 12 men), aged between 40-91 years, were interviewed individually or as a couple. All patients were recruited via their GPs through an open call communicated by word of mouth in our professional network within the Region of Southern Denmark, one of Denmark's five geographically defined regions. The interviews were conducted face-to-face in a setting of the patients' own choosing such as their homes (23), a senior activity house (5) and a public library (2).

When selecting GPs for the individual interviews, the aim was to achieve variation with respect to the GPs' age, gender, practice type, geographical location and years of practice as a GP. The GPs lived and worked within four of Denmark's five regions: the Region of Southern Denmark (17), the Central Denmark Region (4), the North Denmark Region (1), and the Capital Region of Denmark (1), thus including both urban and rural areas. The interviews with the GPs were conducted either face-to-face (15) or by telephone (8) and lasted between 10:53 and 78:23 minutes.

All interviews were conducted by AG and EAH. Semi-structured interview guides included open-ended questions such as "What are the communicative advantages of the email consultation, in your opinion?", "What are the communication challenges?" and "In what ways, if any, do email consultations impact on your relationship with patients/your GP, in your opinion?" Recruitment of interviewees continued until sufficient information power (also often referred to as "saturation") regarding the subject at hand was achieved<sup>30</sup>.

### **Data analysis**

The interviews were transcribed verbatim and coded using the software program NVivo 12. The first and second authors, AG and EAH, coded the transcripts in two phases: an initial open coding and a subsequent closed thematic coding using a node structure that reflected identified themes and subthemes and allowed for expansion and reduction along the way. The analytical

1  
2  
3 process was inspired by Kozinets' netnographic approach<sup>31</sup> and included coding, note-taking,  
4 abstracting/comparing, checking and refining. All authors compared and discussed the identified  
5 themes, relating them to the original transcripts and aligning them where necessary. This  
6 analytical work was carried out in a dialectic (abductive) process where we went inductively  
7 from the empirical examples in the interviews to the theoretical concepts, and deductively from  
8 the theoretical concepts to the empirical examples from the interviews.  
9

### 14 **Patient and public involvement**

15 There was no direct involvement of patients or the public in the design of the present study.  
16  
17  
18  
19

## 20 **RESULTS**

### 23 **Affordances of email consultation as a communication medium**

24 Focusing on email consultations as a communication medium, we found that the most prominent  
25 affordances derived from the thematic analysis were: 1) lower contact threshold, 2) accessing a  
26 new interaction space and 3) access to access (quicker access to face-to-face consultations).  
27 From the perspective of the patients and GPs, these three affordances of email consultations  
28 involved communicative advantages and disadvantages relating to doctor-patient  
29 communication. In the following, we present the three affordances as perceived by patients and  
30 GPs, respectively.  
31  
32  
33  
34  
35  
36  
37

#### 38 **Lower contact threshold**

##### 39 **Patient perspective**

40  
41 With respect to lower contact threshold, the technical affordance 'asynchronicity' (cf. section 1,  
42 Introduction) was key. Many patients stated that they were happy not to have to attend the clinic  
43 in person as they found that email consultations were more convenient than going to see the  
44 doctor. The patients emphasized that they did not want to be any bother, and that email  
45 consultations felt less disruptive than face-to-face consultations. For example, one patient said, "I  
46 don't want to be any trouble because it's probably nothing", and another, when asked why she  
47 preferred email consultations stated: "Because [that way] you are not any trouble. They answer  
48 when they have time".  
49  
50  
51  
52  
53  
54  
55  
56  
57  
58  
59  
60

1  
2  
3 Patients appreciated close contact with their GP which they considered to be facilitated by email  
4 consultations. At the same time, they knew that GPs are busy as they have many other patients to  
5 take care of. As one patient stated, “I also think that by using email consultations, it must take  
6 some of the pressure off [the doctor] in [face-to-face] consultations”. Several patients considered  
7 their GP’s workflow and mentioned that if they sent an email consultation message in the  
8 morning, the GP would answer in the afternoon or the next morning, at the latest. Thus, patients  
9 perceived email consultations as less disturbing for GPs, which made it easier for them to  
10 communicate with their GP without feeling stressed or under time pressure.  
11  
12  
13  
14  
15  
16  
17  
18

### 19 GP perspective

20  
21 The affordance of technical asynchronicity was thematized recurrently by the GPs as one of the  
22 great advantages of email consultations for both patients and GPs: “The advantage is that people  
23 can write whenever they want, at night, in the evening, when they are off work and have the  
24 time, and the advantage for me as a doctor is that I can look at their inquiries when I have the  
25 time”. Many GPs associated the introduction of email consultations in general practice with a  
26 “lower contact threshold”, where quick, convenient access was made possible for patients who  
27 otherwise might have had difficulties attending the clinic, for example, due to late working  
28 hours, long travel distances or mental health issues. One GP described how email consultations  
29 had facilitated increased contact and relationship-building with vulnerable patients, e.g. those  
30 suffering from Asperger’s syndrome or autism, who might be reluctant to see their GP in the  
31 clinic due to their life circumstances.  
32  
33  
34  
35  
36  
37  
38  
39  
40

41 Downsides of a “lower contact threshold” were also mentioned by some GPs. Easy, untriaged  
42 access to GPs in some clinics had led to overuse of email consultations, with some patients  
43 burdening GPs with high volumes of e-mail correspondence. As one GP put it:  
44  
45  
46

47 As 8,000 patients have round-the-clock access to us, we receive an enormous number of  
48 e-mails. For some reason, there are some doctors whom patients feel a strong affinity for,  
49 and those doctors receive many more e-mails than the others. The emails are not  
50 distributed [between us] because they are not triaged. This kind of untriaged access  
51 overloads some.  
52  
53  
54  
55  
56  
57  
58  
59  
60

1  
2  
3 Furthermore, given the direct access facilitated by email consultations and the fact that GPs are  
4 obliged to respond to every email consultation, some GPs narrated that some patients, who  
5 seemed unsure of where else to turn, used email consultations to address issues that extended  
6 beyond the scope of general practice:  
7  
8  
9

10  
11 Now you can write to your doctor 24/7, and they have to answer. I mean, many things  
12 end up here where I just think, “This has absolutely nothing to do with medical practice”.  
13  
14 But you can see that they don’t know where to ask their question, and you spend time on  
15 it anyway.  
16  
17  
18  
19

## 20 21 **A new interaction space is accessible**

### 22 23 Patient perspective

24  
25 The non-physical shared contact space of email consultations broke the traditional association  
26 between social presence and physical proximity, creating a new form of mutual presence or co-  
27 access. For patients, email consultations were perceived as facilitating new conversations with  
28 their GP, which gave them peace of mind. Most patients found that they could ask their GP about  
29 anything in email consultations including their worries and concerns. When asked if email  
30 consultations would weaken their relationship with the GP because of its more formal framing  
31 and written form, one patient stated:  
32  
33  
34  
35  
36  
37

38 Not at all, quite the opposite. [...] If you have it in writing, you can read it, and you can  
39 read it again, because you might have forgotten details. So, for me, it is an advantage [...]  
40 Because when talking, there might be something you can’t remember because there are  
41 so many things [said], but that doesn’t happen when you have it in writing.  
42  
43  
44  
45  
46

47 The written form meant that patients could access and re-access the interaction space without the  
48 GP being present at the same time. For patients, this created a safe feeling, and it was highly  
49 valued by patients that they could access a space that permanently documented their  
50 communication with their GP.  
51  
52  
53  
54  
55

56 Some patients emphasised that the access to their GPs facilitated by email consultations  
57  
58  
59  
60

1  
2  
3 promoted a clear and straightforward form of communication:  
4

5           Of course, we are emotional beings, but if we strip it [communication] of emotional talk,  
6           it is very concrete. Does my knee hurt or not? Can I stretch my leg or not? I mean, that is  
7           the way my brain works.  
8  
9

10  
11  
12 Others, on the other hand, liked writing personal and emotional messages to their GP, and found  
13 it easy to raise challenging topics by e-mail. Email consultations facilitated a new way of  
14 gathering one's thoughts, as this patient explained:  
15  
16

17           I thought that it must be possible to gather my thoughts in a different way [...]. When it  
18           became possible to write to them, I wrote, "Sleeping is not going well. I don't feel like  
19           taking the sleeping pills you gave me because I don't want to deal with the side effects.  
20           Are there other options?", and then I get a response. And it is always quick, and it is  
21           concrete. It is very concrete, and I am forced to think in a very concrete way.  
22  
23  
24  
25  
26  
27

#### 28 GP perspective

29  
30 Regarding the co-access facilitated by email consultations, many GPs stated that they  
31 appreciated email consultation communication because of its brevity and precision. Compared to  
32 telephone consultations, email consultations were perceived as compelling patients as well as  
33 GPs to communicate effectively: "What I really like about email is that it forces both parties to  
34 be brief and a little more precise". Moreover, email consultations were perceived by GPs as  
35 providing patients with the opportunity to reflect on their communication, resulting in more  
36 considered and constructive communication: "I think the strength of email is that when they ask  
37 me something, they have thought about what they want to ask about".  
38  
39  
40  
41  
42  
43  
44

45 Email consultations were also experienced by GPs as facilitating access to new forms of  
46 affective communication. For example, if patients were dissatisfied with their care, GPs deemed  
47 email consultations to be a good medium for patients' expression of critique:  
48  
49  
50

51           If they are unsatisfied about something, they are afraid to say upfront... I have found that  
52           a couple of times you receive an email where they write and tell you what they are  
53  
54  
55  
56  
57  
58  
59  
60

1  
2  
3           unsatisfied with. That way, they have given it a lot of thought. [...] So, it is really good  
4           for that purpose, and it opens up possibilities.  
5  
6

7 Furthermore, GPs found that email consultations could facilitate emotional disclosure to a  
8 greater extent than face-to-face consultations. Patients were able to write to their GP in the  
9 moment of affect (e.g. anxiety, stress, anger and happiness), in the knowledge that the GP would  
10 respond at some point. Several examples were provided by the GPs of how their patients shared  
11 their feelings with them, e.g. if they were feeling miserable or better in the direct aftermath of a  
12 treatment or social gathering.  
13  
14  
15  
16  
17

## 21 **Access to access**

### 23 Patient perspective

24  
25 Compared to telephone and face-to-face consultations, patients found email consultations to be  
26 easier, more direct and most importantly, untriaged. The patients did not meet a “gatekeeping  
27 function” in the guise of a medical secretary or a nurse, nor did they experience delays in getting  
28 their message across. In that sense, email consultations were perceived as a means of dealing  
29 with a situation directly. If a problem could not be solved via an email consultation, email  
30 consultations could expedite the booking of a clinical appointment. One patient described the  
31 improved access to their GP as follows: “Because I mean, you can't – after all, you don't come  
32 directly in contact with the doctor, it's through the nurses up there, right? [...] If I have to go to  
33 the doctor, I write.”  
34  
35  
36  
37  
38  
39  
40  
41  
42

43 Moreover, the patients stated that if GPs deemed the content of a patient's email consultation  
44 message to be unclear or in other ways too complicated to answer directly, he/she typically  
45 recommended a physical consultation. Sometimes, GPs booked an appointment time and  
46 included information about it in the email consultation response. In that way, patients perceived  
47 that they got access to access (face-to-face consultation) more quickly than if they phoned. One  
48 patient explained as follows:  
49  
50  
51  
52  
53

54           I just wrote to him, and I got an appointment. And it was easier to get an appointment  
55  
56  
57



1  
2  
3 directly with him than it is if you book online because then it is several months away. I  
4 got an appointment the next day every time.  
5  
6  
7

8 Another patient emphasized the usefulness of getting their GP's initial assessment of a situation  
9 via email consultations:  
10

11  
12  
13 And that is also okay, because then they can judge "There must be something, let's get  
14 her down here and look at it". If they had judged "That is nothing", then they would just  
15 write "You don't have to worry about that".  
16  
17  
18

19  
20 Thus, after the email consultation, the patient knew if the GP considered a physical consultation  
21 to be necessary.  
22  
23

#### 24 25 GP perspective

26  
27 Reflecting patients' experiences of how email consultations facilitated quick access to access, the  
28 GPs discussed how patients used email consultations as a way of bypassing waiting lists:  
29 "Because sometimes, it is because they want to squeeze themselves in because they can't get an  
30 appointment."  
31  
32  
33

34  
35 Furthermore, GPs described how email consultations were used by some patients to "test the  
36 water", checking with their GP whether their health problem elicited a "wait and see" or "book  
37 an appointment immediately" response:  
38  
39  
40

41 Sometimes, someone asks about a certain issue, "Do I need an appointment?" And it can  
42 be anything from giving them advice and saying, "You can just wait and see" or "You  
43 need an acute appointment for that – you should call and get one today".  
44  
45  
46

47 According to some GPs, these kinds of email consultations could be redundant or wasteful as  
48 they would very often elicit responses of the type: "We need to see you, you have to come in",  
49 meaning "What you are presenting, we can't deal with via email"; one GP estimated that they  
50 redirected "one third" of their email consultations to face-to-face consultations. However, in  
51 other cases, email consultations could increase effectiveness: "There are definitely some where  
52  
53  
54  
55  
56  
57  
58  
59  
60

1  
2  
3 we say, “You don’t need to come in, you will get a prescription”. Like, threadworms, I don’t  
4 need to see that.”  
5  
6  
7

## 8 9 **DISCUSSION AND CONCLUSION**

### 10 11 **Discussion**

12  
13 In this article, we explored a large qualitative data set of interviews to investigate GPs’ and  
14 patients’ perspectives on the communicative advantages and disadvantages of email  
15 consultations as a medium for accessing each other. We drew on a media-theoretical framework,  
16 focusing on the concept of affordances, as we wanted to shed light on what the *medium* meant  
17 for perceived communicative advantages and disadvantages of this still relatively new form of  
18 patient-doctor consultation. Three affordances were evident in the subsets of data on doctors’ and  
19 patients’ perspectives: email consultations were associated with a *lower contact threshold*, the  
20 availability of a *new interaction space*, and *access to access*. These affordances are important as  
21 they say something about the primary characteristics of email consultations as interpreted by  
22 their users. They may also be relevant for other forms of e-mediated communication in  
23 healthcare such as doctor-patient online forums; however, further studies would be required to  
24 explore this. As pointed out by Mold et al. (2019) in their review of 57 electronic consultation  
25 studies in primary care, remote care includes many other forms of communication than email  
26 (e.g. telephone, video, text messaging, web-based portals etc.) and research in this area  
27 recognizes this heterogeneity<sup>8</sup>.  
28  
29  
30  
31  
32  
33  
34  
35  
36  
37  
38  
39  
40

41 Many of our findings on GPs’ and patients’ perspectives on email consultation communication  
42 resonate with those of previous studies. Patients in our study appreciated the lower contact  
43 threshold to their GPs. Similarly, in previous research, patients liked being able to contact their  
44 GPs from the convenience of their own homes at times that suited them<sup>2 32</sup>.  
45  
46  
47  
48  
49

50 Similar to other studies<sup>33-35</sup>, patients in our study welcomed having time in email consultations to  
51 reflect over their accounts of their health concerns. In our data, patients’ and GPs’ appreciation  
52 of the brief, matter-of-fact communication of email consultations reflects the leanness associated  
53 with the medium of e-mail<sup>36</sup>. However, we also found that email consultations make it easier for  
54  
55  
56  
57  
58  
59  
60

1  
2  
3 patients to write than talk about sensitive or emotional topics, suggest their own hypotheses for  
4 discussion, and ask questions, which resonates with previous findings<sup>32 37-41</sup>. Moreover, in  
5 previous research, doctors have reported that when used appropriately for relatively  
6 straightforward tasks (e.g. prescription refills and information sharing regarding medication or  
7 treatments), email consultations can impact the doctor-patient relationship positively and  
8 improve continuity of care<sup>42 43</sup>. Patients in our study anticipated that the time used on email  
9 consultations might mean more time for consultations in the clinic.  
10  
11  
12  
13  
14  
15  
16

17 Doctors have voiced their concerns about the potentially negative effects of email consultations  
18 on workload, compensation and litigation<sup>7 44</sup> and that email consultations grant patients untriaged  
19 access<sup>43</sup>. We found similar results in our data related to GPs' concerns about access to access,  
20 whereas patients were pleased about untriaged access to their GPs.  
21  
22  
23  
24  
25

26 What our article offers with respect to previous studies is a framework for interpreting doctors'  
27 and patients' perspectives that links to the medium of email consultations. The findings  
28 presented in this article are therefore not "just" advantages and disadvantages of email  
29 consultations; rather, they represent advantages and disadvantages of perceived affordances of  
30 the medium of email consultations, i.e. e-mail. The lack of a concerted medium-based focus in  
31 previous research on email consultations misses the critical aspect of email consultations as  
32 occurring in a different medium to the clinical dyad. As we have shown in our article, email  
33 consultations permit access that is de-coupled from time and space which significantly impacts  
34 the communication that is possible between patients and doctors.  
35  
36  
37  
38  
39  
40  
41  
42

43 A strength of our study is the theoretical framework that draws on affordance theory coupled  
44 with a qualitative approach that involves deductive and inductive approaches; we suggest that  
45 this could be useful for other studies exploring emerging communicative practices that use new  
46 media in healthcare settings. Besides our theoretical approach, other strengths of this study  
47 include the use of interviews to investigate perspectives on email consultations and a large data  
48 set. In addition, we see it as very valuable that the perspectives of both GPs and patients are  
49 included in our study of the affordances of the medium of email consultations.  
50  
51  
52  
53  
54  
55  
56  
57  
58  
59  
60

1  
2  
3 A potential limitation of the study is that the majority of patients represented were born in 1954  
4 or earlier (> 65 years) which might influence the results. Thus, our findings might not be  
5 generalizable to all age groups. Moreover, there is a need for further studies in different countries  
6 as our findings are likely to be inflected by the local Danish context (e.g. the triage system may  
7 operate differently). Finally, we also need to highlight the likelihood that as our patient  
8 interviewees were those who chose to use email consultations, they may be quite technology-  
9 savvy and thus not be representative of the general population.  
10  
11  
12  
13  
14  
15  
16  
17

## 18 **Conclusion**

20 This study adds knowledge of how the affordances of the medium of email consultation may  
21 impact access in doctor-patient communication. Communication may not only be more frequent  
22 (lower contact threshold), it may also give rise to very different communicative practices as  
23 witnessed by the affordances of the availability of a new interaction space. Moreover, email  
24 consultations facilitate access to access as patients have a new means of gaining face-to-face  
25 access to their GPs. Email consultations thus do not simply extend existing forms of contact and  
26 consultation (face-to-face and telephone); they produce a new communication space with its own  
27 affordances which result in new practices. With increasing use of email consultations, it is  
28 important to be alert to the possibility that email consultations may involve new roles for patients  
29 and GPs, and that there may be challenges involved in transferring some GP-patient  
30 communication to the written medium. To keep pace with such developments, we argue, like  
31 Schiller<sup>45</sup>, that the knowledge and skill sets that could help manage the communicative demands  
32 of email consultations should be reflected in doctors' education. Also, at policy level, there  
33 should be greater awareness that email consultations may add extra tasks to GPs, as although  
34 email consultations have been promoted to improve effectiveness in healthcare systems, they  
35 may increase work strain on GPs.  
36  
37  
38  
39  
40  
41  
42  
43  
44  
45  
46  
47  
48

## 49 **Acknowledgements**

50  
51  
52 We would like to thank all the patients and the GPs who participated in our study. We would  
53 also like to thank student assistant Karoline Søberg for all her administrative help.  
54  
55  
56  
57  
58  
59  
60

### **Contributors**

All authors (AG, EAH, MNB, AFB) have substantially contributed to the formulation of the research question and design of the study. All interviews were conducted by AG and EAH. The first and second authors, AG and EAH, coded the transcripts in two phases (open and thematic). All authors compared and discussed the identified themes, relating them to the original transcripts and aligning them where necessary. All authors have contributed to the process of writing the article, including proof-reading.

### **Funding**

The present study was supported by a grant from the VELUX FOUNDATIONS [grant number 18158], and an AUFF Starting Grant [AUFF-E-2015-FLS-7-30].

### **Competing Interests**

None declared.

### **Patient consent for publication**

Not required.

### **Ethics approval**

All participants gave written consent and were informed that participation in the study was voluntary. The study was approved by the institutional review board of the University of Southern Denmark, the Research and Innovation Organization (RIO) (Journal no. 10457) and was conducted in accordance with the General Data Protection Regulation (GDPR) and the Declaration of Helsinki.

### **Data sharing statement**

We do not have ethics approval to share raw data from our interviews.

### **References**

1. Andreassen HK. What does an e-mail address add?-Doing health and technology at home. *Social science & medicine* 2011;72(4):521-28.
2. Ball MJ, Lillis J. E-health: transforming the physician/patient relationship. *International journal of medical informatics* 2001;61(1):1-10.
3. Recupero PR. E-mail and the psychiatrist-patient relationship. *Journal of the American Academy of Psychiatry and the Law Online* 2005;33(4):465-75.
4. Ye J, Rust G, Fry-Johnson Y, et al. E-mail in patient-provider communication: A systematic review. *Patient education and counseling* 2010;80(2):266-73.
5. Newhouse N, Lupiáñez-Villanueva F, Codagnone C, et al. Patient use of email for health care communication purposes across 14 European countries: an analysis of users according to demographic and health-related factors. *Journal of medical internet research* 2015;17(3):e58.
6. Fagerlund AJ, Holm IM, Zanaboni P. General practitioners' perceptions towards the use of digital health services for citizens in primary care: a qualitative interview study. *BMJ Open* 2019;9(5):e028251. doi: 10.1136/bmjopen-2018-028251
7. Fage-Butler AM, Nisbeth Jensen M. Medical terminology in online patient-patient communication: evidence of high health literacy? *Health Expectations* 2016;19(3):643-53.
8. Mold F, Henty J, Lai Y, et al. Electronic Consultation in Primary Care Between Providers and Patients: Systematic Review. *JMIR Med Inform* 2019;Dec 3;7(4) doi: 10.2196/13042.
9. Seier K. Praktiserende læger har flere patienter end nogensinde før [GPs have more patients than ever before] 2018 [updated 28.08.2018. Available from: <https://www.dr.dk/nyheder/regionale/nordjylland/praktiserende-laeger-har-flere-patienter-und-nogensinde-foer> accessed 31.01.2020.
10. Kert K, Flach AS. Kø i venteværelset: Antallet af patienter per læge har aldrig været så højt [Queue in the waiting room: The number of patients per doctor has never been so high] 2019 [updated 16.01.2019. Available from: <https://www.dr.dk/nyheder/regionale/hovedstadsomraadet/koe-i-ventevaerlset-antallet-af-patienter-laege-har-aldrig> accessed 31.01.2020.
11. Gillespie R. Architecture and power: a family planning clinic as a case study. *Health & place* 2002;8(3):211-20.
12. Martin D, Nettleton S, Buse C, et al. Architecture and health care: a place for sociology. *Sociology of health & illness* 2015;37(7):1007-22.
13. Lupton D. *Medicine as Culture: Illness, disease and the body*. London: Sage 2012.
14. Huygens MW, Swinkels IC, Verheij RA, et al. Understanding the use of email consultation in primary care using a retrospective observational study with data of Dutch electronic health records. *BMJ open* 2018;8(1):e019233.
15. PLO. Praktiserende Lægers Organisation [The Danish Organization of General Practitioners]. Lægernes overenskomst om almen praksis [Doctor's agreement], 2010.
16. PLO. Praktiserende Lægers Organisation [The Danish Organization of General Practitioners]. Aktivitet og økonomi i almen praksis i dagtid og vagttid 2007 til 2019. [Activity and economy in General Practice 2007-2019]. 2019 [Available from: [https://www.laeger.dk/sites/default/files/aktivitet\\_og\\_oekonomi\\_2019.pdf](https://www.laeger.dk/sites/default/files/aktivitet_og_oekonomi_2019.pdf) accessed 4th of August 2020.
17. Meyrowitz J. *No sense of place: The impact of electronic media on social behavior*: Oxford University Press 1986.

18. Gibson JJ. The theory of affordances. In: Shaw R, Bransford J, eds. *Perceiving, acting and knowing: Toward an ecological psychology*. Hillsdale, New Jersey Lawrence Erlbaum Associates 1977.
19. Gibson JJ. *The Ecological Approach to Perception*. London Houghton Mifflin 1979.
20. Norman D. *The design of everyday things*: London: MIT Press, 1990.
21. Hutchby I. Technologies, Texts and Affordances. *Sociology* 2001;35(2):441-56.
22. Majchrzak A, Markus ML. Technology affordances and constraints in management information systems (MIS). *Encyclopedia of Management Theory*, (Ed: E Kessler), Sage Publications, Forthcoming 2012
23. Grønning A. *Digitale samtaler*. Frederiksberg: Samfundslitteratur 2018.
24. Vaast E, Kaganer E. Social media affordances and governance in the workplace: An examination of organizational policies. *Journal of Computer-Mediated Communication* 2013;19(1):78-101. doi: 10.1111/jcc4.12032
25. Fayard A-L, Weeks J. Who Moved My Cube? *Harvard Business Review* 2011;89(7/8):102-10.
26. Leonardi PM. When flexible routines meet flexible technologies: Affordance, constraint, and the imbrication of human and material agencies. *MIS quarterly* 2011:147-67.
27. Leonardi PM, Barley SR. What's under construction here? Social action, materiality, and power in constructivist studies of technology and organizing. *Academy of Management Annals* 2010;4(1):1-51.
28. Markus ML, Silver MS. A foundation for the study of IT effects: A new look at DeSanctis and Poole's concepts of structural features and spirit. *Journal of the Association for Information systems* 2008;9(10):5.
29. Grønning A. *Personen bag: Tilstedevær i e-mail som interaktionsform mellem kunde og medarbejder i dansk forsikringskontekst*. København: Samfundslitteratur 2006.
30. Malterud K, Siersma VD, Guassora AD. Sample size in qualitative interview studies: guided by information power. *Qualitative health research* 2016;26(13):1753-60.
31. Kozinets RV. Netnography. *The international encyclopedia of digital communication and society* 2015:1-8.
32. Baur C. Limiting factors on the transformative powers of e-mail in patient-physician relationships: a critical analysis. *Health communication* 2000;12(3):239-59.
33. Atherton H, Pappas Y, Heneghan C, et al. Experiences of using email for general practice consultations: a qualitative study. *Br J Gen Pract* 2013;63(616):e760-e67.
34. Hansen CS, Christensen KL, Ertmann R. Patients and general practitioners have different approaches to e-mail consultations. *Dan Med J* 2014;61(6):A4863.
35. Hartgers M, Jatoi A. E-Mail and photographs: A case report of a patient-initiated diagnostic tool in the era of electronic communication. *Journal of palliative medicine* 2010;13(3):335-37.
36. Rethinking media richness: Towards a theory of media synchronicity. Proceedings of the 32nd Annual Hawaii International Conference on Systems Sciences 1999 HICSS-32 Abstracts and CD-ROM of Full Papers; 1999. IEEE.
37. Lee SA, Zuercher RJ. A current review of doctor-patient computer-mediated communication. *Journal of Communication in Healthcare* 2017;10(1):22-30.
38. Roter DL, Larson S, Sands DZ, et al. Can e-mail messages between patients and physicians be patient-centered? *Health communication* 2008;23(1):80-86.

- 1  
2  
3 39. Tjora A, Tran T, Faxvaag A. Privacy vs usability: a qualitative exploration of patients'  
4 experiences with secure Internet communication with their general practitioner. *Journal*  
5 *of Medical Internet Research* 2005;7(2):e15.  
6  
7 40. Zandbelt LC, de Kanter FE, Ubbink DT. E-consulting in a medical specialist setting:  
8 Medicine of the future? *Patient education and counseling* 2016;99(5):689-705.  
9  
10 41. Assing Hvidt E, Søndergaard J, Klausen M, et al. Not just an information-delivery tool:  
11 Experiences with the relational potential of email consultation among general  
12 practitioners. *Scand J Prim Health Care* 2020;accepted/in press.  
13  
14 42. Moyer CA, Stern DT, Dobias KS, et al. Bridging the electronic divide: patient and provider  
15 perspectives on e-mail communication in primary care. *The American journal of*  
16 *managed care* 2002;8(5):427-33.  
17  
18 43. Patt MR, Houston TK, Jenckes MW, et al. Doctors who are using e-mail with their patients: a  
19 qualitative exploration. *Journal of Medical Internet Research* 2003;5(2):e9.  
20  
21 44. Car J, Sheikh A. Email consultations in health care: 2—acceptability and safe application.  
22 *Bmj* 2004;329(7463):439-42.  
23  
24 45. Schiller JH, Christner JG, Stansfield RB, et al. What parents want from emails with their  
25 pediatrician: Implications for teaching communication skills. *Patient education and*  
26 *counseling* 2013;92(1):61-66.  
27  
28  
29  
30  
31  
32  
33  
34  
35  
36  
37  
38  
39  
40  
41  
42  
43  
44  
45  
46  
47  
48  
49  
50  
51  
52  
53  
54  
55  
56  
57  
58  
59  
60



# Reporting checklist for qualitative study.

Based on the SRQR guidelines.

## Instructions to authors

Complete this checklist by entering the page numbers from your manuscript where readers will find each of the items listed below.

Your article may not currently address all the items on the checklist. Please modify your text to include the missing information. If you are certain that an item does not apply, please write "n/a" and provide a short explanation.

Upload your completed checklist as an extra file when you submit to a journal.

In your methods section, say that you used the SRQR reporting guidelines, and cite them as:

O'Brien BC, Harris IB, Beckman TJ, Reed DA, Cook DA. Standards for reporting qualitative research: a synthesis of recommendations. Acad Med. 2014;89(9):1245-1251.

| Title | Reporting Item                                                                                                                                                                                                                                                 | Page Number |
|-------|----------------------------------------------------------------------------------------------------------------------------------------------------------------------------------------------------------------------------------------------------------------|-------------|
|       | <p><a href="#">#1</a> Concise description of the nature and topic of the study identifying the study as qualitative or indicating the approach (e.g. ethnography, grounded theory) or data collection methods (e.g. interview, focus group) is recommended</p> | 1           |

## Abstract

[#2](#) Summary of the key elements of the study using the abstract format of the intended publication; typically includes background, purpose, methods, results and conclusions

## Introduction

Problem formulation [#3](#) Description and significance of the problem / phenomenon studied: review of relevant theory and empirical work; problem statement

Purpose or research question [#4](#) Purpose of the study and specific objectives or questions

## Methods

Qualitative approach and research paradigm [#5](#) Qualitative approach (e.g. ethnography, grounded theory, case study, phenomenology, narrative research) and guiding theory if appropriate; identifying the research paradigm (e.g. postpositivist, constructivist / interpretivist) is also recommended; rationale. The rationale should briefly discuss the justification for choosing that theory, approach, method or technique rather than other options available; the assumptions and limitations implicit in those choices and how those choices influence study conclusions and transferability.

As appropriate the rationale for several items might be discussed together.

|    |                           |                     |                                                           |
|----|---------------------------|---------------------|-----------------------------------------------------------|
| 1  |                           |                     |                                                           |
| 2  |                           |                     |                                                           |
| 3  |                           |                     |                                                           |
| 4  |                           |                     |                                                           |
| 5  |                           |                     |                                                           |
| 6  | Researcher                | <a href="#">#6</a>  | Researchers' characteristics that may influence the       |
| 7  |                           |                     |                                                           |
| 8  | characteristics and       |                     | research, including personal attributes, qualifications / |
| 9  |                           |                     |                                                           |
| 10 | reflexivity               |                     | experience, relationship with participants, assumptions   |
| 11 |                           |                     | and / or presuppositions; potential or actual interaction |
| 12 |                           |                     | between researchers' characteristics and the research     |
| 13 |                           |                     | questions, approach, methods, results and / or            |
| 14 |                           |                     | transferability                                           |
| 15 |                           |                     |                                                           |
| 16 |                           |                     |                                                           |
| 17 |                           |                     |                                                           |
| 18 |                           |                     |                                                           |
| 19 |                           |                     |                                                           |
| 20 |                           |                     |                                                           |
| 21 |                           |                     |                                                           |
| 22 | Context                   | <a href="#">#7</a>  | Setting / site and salient contextual factors; rationale  |
| 23 |                           |                     |                                                           |
| 24 |                           |                     |                                                           |
| 25 | Sampling strategy         | <a href="#">#8</a>  | How and why research participants, documents, or          |
| 26 |                           |                     |                                                           |
| 27 |                           |                     | events were selected; criteria for deciding when no       |
| 28 |                           |                     | further sampling was necessary (e.g. sampling             |
| 29 |                           |                     | saturation); rationale                                    |
| 30 |                           |                     |                                                           |
| 31 |                           |                     |                                                           |
| 32 |                           |                     |                                                           |
| 33 |                           |                     |                                                           |
| 34 |                           |                     |                                                           |
| 35 | Ethical issues pertaining | <a href="#">#9</a>  | Documentation of approval by an appropriate ethics        |
| 36 |                           |                     |                                                           |
| 37 | to human subjects         |                     | review board and participant consent, or explanation      |
| 38 |                           |                     | for lack thereof; other confidentiality and data security |
| 39 |                           |                     | issues                                                    |
| 40 |                           |                     |                                                           |
| 41 |                           |                     |                                                           |
| 42 |                           |                     |                                                           |
| 43 |                           |                     |                                                           |
| 44 |                           |                     |                                                           |
| 45 | Data collection methods   | <a href="#">#10</a> | Types of data collected; details of data collection       |
| 46 |                           |                     |                                                           |
| 47 |                           |                     | procedures including (as appropriate) start and stop      |
| 48 |                           |                     | dates of data collection and analysis, iterative process, |
| 49 |                           |                     | triangulation of sources / methods, and modification of   |
| 50 |                           |                     | procedures in response to evolving study findings;        |
| 51 |                           |                     | rationale                                                 |
| 52 |                           |                     |                                                           |
| 53 |                           |                     |                                                           |
| 54 |                           |                     |                                                           |
| 55 |                           |                     |                                                           |
| 56 |                           |                     |                                                           |
| 57 |                           |                     |                                                           |
| 58 |                           |                     |                                                           |
| 59 |                           |                     |                                                           |
| 60 |                           |                     |                                                           |

|    |                         |                     |                                                          |     |
|----|-------------------------|---------------------|----------------------------------------------------------|-----|
| 1  | Data collection         | <a href="#">#11</a> | Description of instruments (e.g. interview guides,       | 4-5 |
| 2  |                         |                     | questionnaires) and devices (e.g. audio recorders)       |     |
| 3  | instruments and         |                     |                                                          |     |
| 4  |                         |                     |                                                          |     |
| 5  | technologies            |                     | used for data collection; if / how the instruments(s)    |     |
| 6  |                         |                     |                                                          |     |
| 7  |                         |                     | changed over the course of the study                     |     |
| 8  |                         |                     |                                                          |     |
| 9  |                         |                     |                                                          |     |
| 10 |                         |                     |                                                          |     |
| 11 | Units of study          | <a href="#">#12</a> | Number and relevant characteristics of participants,     | 5   |
| 12 |                         |                     |                                                          |     |
| 13 |                         |                     | documents, or events included in the study; level of     |     |
| 14 |                         |                     |                                                          |     |
| 15 |                         |                     | participation (could be reported in results)             |     |
| 16 |                         |                     |                                                          |     |
| 17 |                         |                     |                                                          |     |
| 18 | Data processing         | <a href="#">#13</a> | Methods for processing data prior to and during          | 5   |
| 19 |                         |                     |                                                          |     |
| 20 |                         |                     | analysis, including transcription, data entry, data      |     |
| 21 |                         |                     |                                                          |     |
| 22 |                         |                     | management and security, verification of data integrity, |     |
| 23 |                         |                     |                                                          |     |
| 24 |                         |                     | data coding, and anonymisation / deidentification of     |     |
| 25 |                         |                     |                                                          |     |
| 26 |                         |                     | excerpts                                                 |     |
| 27 |                         |                     |                                                          |     |
| 28 |                         |                     |                                                          |     |
| 29 |                         |                     |                                                          |     |
| 30 |                         |                     |                                                          |     |
| 31 | Data analysis           | <a href="#">#14</a> | Process by which inferences, themes, etc. were           | 6   |
| 32 |                         |                     |                                                          |     |
| 33 |                         |                     | identified and developed, including the researchers      |     |
| 34 |                         |                     |                                                          |     |
| 35 |                         |                     | involved in data analysis; usually references a specific |     |
| 36 |                         |                     |                                                          |     |
| 37 |                         |                     | paradigm or approach; rationale                          |     |
| 38 |                         |                     |                                                          |     |
| 39 |                         |                     |                                                          |     |
| 40 |                         |                     |                                                          |     |
| 41 | Techniques to enhance   | <a href="#">#15</a> | Techniques to enhance trustworthiness and credibility    | -   |
| 42 |                         |                     |                                                          |     |
| 43 | trustworthiness         |                     | of data analysis (e.g. member checking, audit trail,     |     |
| 44 |                         |                     |                                                          |     |
| 45 |                         |                     | triangulation); rationale                                |     |
| 46 |                         |                     |                                                          |     |
| 47 |                         |                     |                                                          |     |
| 48 | <b>Results/findings</b> |                     |                                                          |     |
| 49 |                         |                     |                                                          |     |
| 50 |                         |                     |                                                          |     |
| 51 | Syntheses and           | <a href="#">#16</a> | Main findings (e.g. interpretations, inferences, and     | 6-  |
| 52 |                         |                     |                                                          |     |
| 53 | interpretation          |                     | themes); might include development of a theory or        |     |
| 54 |                         |                     |                                                          |     |
| 55 |                         |                     | model, or integration with prior research or theory      |     |
| 56 |                         |                     |                                                          |     |
| 57 |                         |                     |                                                          |     |
| 58 |                         |                     |                                                          |     |
| 59 |                         |                     |                                                          |     |
| 60 |                         |                     |                                                          |     |

1 Links to empirical data [#17](#) Evidence (e.g. quotes, field notes, text excerpts, 6-  
2  
3 photographs) to substantiate analytic findings  
4  
5

## 6 Discussion

7  
8  
9  
10 Intergration with prior [#18](#) Short summary of main findings; explanation of how 12  
11 work, implications, findings and conclusions connect to, support, elaborate  
12 transferability and on, or challenge conclusions of earlier scholarship;  
13 contribution(s) to the field discussion of scope of application / generalizability;  
14 identification of unique contributions(s) to scholarship  
15  
16  
17  
18  
19 in a discipline or field  
20  
21  
22  
23

24 Limitations [#19](#) Trustworthiness and limitations of findings 14  
25  
26

## 27 Other

28  
29  
30 Conflicts of interest [#20](#) Potential sources of influence of perceived influence on 15  
31 study conduct and conclusions; how these were  
32 managed  
33  
34  
35  
36  
37

38 Funding [#21](#) Sources of funding and other support; role of funders in 15  
39 data collection, interpretation and reporting  
40  
41  
42

43 None The SRQR checklist is distributed with permission of Wolters Kluwer © 2014 by the Association  
44 of American Medical Colleges. This checklist can be completed online using

45  
46 <https://www.goodreports.org/>, a tool made by the [EQUATOR Network](#) in collaboration with

47  
48  
49  
50 [Penelope.ai](#)  
51  
52  
53  
54  
55  
56  
57  
58  
59  
60

# BMJ Open

## How do patients and general practitioners in Denmark perceive the communicative advantages and disadvantages of access via email consultations? A media-theoretical qualitative study

|                                 |                                                                                                                                                                                                                                                                                                                                                                                 |
|---------------------------------|---------------------------------------------------------------------------------------------------------------------------------------------------------------------------------------------------------------------------------------------------------------------------------------------------------------------------------------------------------------------------------|
| Journal:                        | <i>BMJ Open</i>                                                                                                                                                                                                                                                                                                                                                                 |
| Manuscript ID                   | bmjopen-2020-039442.R2                                                                                                                                                                                                                                                                                                                                                          |
| Article Type:                   | Original research                                                                                                                                                                                                                                                                                                                                                               |
| Date Submitted by the Author:   | 06-Oct-2020                                                                                                                                                                                                                                                                                                                                                                     |
| Complete List of Authors:       | Grønning, Anette; University of Southern Denmark, Department for the Study of Culture<br>Assing Hvidt, Elisabeth; University of Southern Denmark, Research Unit of General Practice, Department of Public Health<br>Brøgger, Matilde; Aarhus University, School of Communication and Culture<br>Fage-Butler, Antoinette; Aarhus University, School of Communication and Culture |
| <b>Primary Subject Heading</b>: | General practice / Family practice                                                                                                                                                                                                                                                                                                                                              |
| Secondary Subject Heading:      | Communication, General practice / Family practice, Qualitative research                                                                                                                                                                                                                                                                                                         |
| Keywords:                       | QUALITATIVE RESEARCH, PRIMARY CARE, Telemedicine < BIOTECHNOLOGY & BIOINFORMATICS                                                                                                                                                                                                                                                                                               |
|                                 |                                                                                                                                                                                                                                                                                                                                                                                 |

SCHOLARONE™  
Manuscripts



I, the Submitting Author has the right to grant and does grant on behalf of all authors of the Work (as defined in the below author licence), an exclusive licence and/or a non-exclusive licence for contributions from authors who are: i) UK Crown employees; ii) where BMJ has agreed a CC-BY licence shall apply, and/or iii) in accordance with the terms applicable for US Federal Government officers or employees acting as part of their official duties; on a worldwide, perpetual, irrevocable, royalty-free basis to BMJ Publishing Group Ltd ("BMJ") its licensees and where the relevant Journal is co-owned by BMJ to the co-owners of the Journal, to publish the Work in this journal and any other BMJ products and to exploit all rights, as set out in our [licence](#).

The Submitting Author accepts and understands that any supply made under these terms is made by BMJ to the Submitting Author unless you are acting as an employee on behalf of your employer or a postgraduate student of an affiliated institution which is paying any applicable article publishing charge ("APC") for Open Access articles. Where the Submitting Author wishes to make the Work available on an Open Access basis (and intends to pay the relevant APC), the terms of reuse of such Open Access shall be governed by a Creative Commons licence – details of these licences and which [Creative Commons](#) licence will apply to this Work are set out in our licence referred to above.

Other than as permitted in any relevant BMJ Author's Self Archiving Policies, I confirm this Work has not been accepted for publication elsewhere, is not being considered for publication elsewhere and does not duplicate material already published. I confirm all authors consent to publication of this Work and authorise the granting of this licence.

1  
2  
3 **TITLE PAGE**  
4

5 **How do patients and general practitioners in Denmark perceive the communicative**  
6 **advantages and disadvantages of access via email consultations? A media-theoretical**  
7 **qualitative study**  
8  
9

10  
11 Anette Grønning<sup>1</sup>, Elisabeth Assing Hvidt<sup>1,2</sup>, Matilde Nisbeth Brøgger<sup>3</sup> & Antoinette Fage-  
12 Butler<sup>3</sup>  
13  
14

15  
16  
17  
18 <sup>1</sup> Department for the Study of Culture, University of Southern Denmark, Campusvej 55, 5230  
19 Odense M, Denmark. [ahg@sdu.dk](mailto:ahg@sdu.dk)  
20  
21

22  
23 <sup>2</sup> Research Unit of General Practice, Department of Public Health, University of Southern  
24 Denmark, J.B. Winsløws Vej 9A, 5000 Odense C, Denmark. [ehvidt@health.sdu.dk](mailto:ehvidt@health.sdu.dk)  
25  
26

27  
28 <sup>3</sup> School of Communication and Culture, Aarhus University, Jens Chr. Skous Vej 4, 8000 Aarhus  
29 C, Denmark. [matnj@cc.au.dk](mailto:matnj@cc.au.dk) & [fage-butler@cc.au.dk](mailto:fage-butler@cc.au.dk)  
30  
31

32  
33 ---  
34  
35

36 **Corresponding author:** Anette Grønning, Department for the Study of Culture, University of  
37 Southern Denmark, Campusvej 55, 5230 Odense M, Denmark. [ahg@sdu.dk](mailto:ahg@sdu.dk), +45 6550 4039  
38  
39  
40

41  
42  
43  
44  
45  
46  
47  
48 **Word Count:** 4312 words.  
49  
50



## ABSTRACT

**Objective:** Email consultations have become part of everyday doctor-patient communication in many countries. The objective of this study is to investigate how patients and general practitioners (GPs) perceive the communicative advantages and disadvantages of access via email consultation drawing on a media-theoretical perspective.

**Design:** We analysed qualitative interview data from general practices in Denmark to identify salient themes.

**Participants:** Our data set consists of semi-structured interviews with 30 patients and 23 GPs. The data were collected from February 2016 to September 2019.

**Results:** The following themes emerged: 1) lower contact threshold, 2) accessing a new interaction space and 3) access to access. From the patients' perspective, email consultations provided more convenient contact with their GP. From the GPs' perspective, email consultations facilitated contact with patients whom they otherwise rarely saw, but also resulted in overuse and inappropriate use. Patients and GPs considered email consultations as inviting new interactions, facilitating also communication about emotional and sensitive issues. Both patients and GPs experienced email consultations as a way in which patients could achieve easier access to face-to-face consultations (access to access).

**Conclusion:** Drawing on a media perspective, this study adds knowledge of how the potentials of the medium of email consultations are perceived by GPs and patients. Email consultations do not simply extend existing forms of contact and consultation (face-to-face and telephone); they produce a new communication space with its own possibilities which result in new practices. With increasing use of email consultations, there may be challenges involved in transferring GP-patient communication to the written medium.

### Keywords

Email consultation, access, communicative advantages and disadvantages, affordances, Denmark, email, general practice, computer-mediated communication

## Article Summary

### Strengths and limitations of this study

- The theoretical framework that draws on affordance theory is useful for other studies exploring emerging communicative practices that use new media in healthcare settings.
- The use of interviews to investigate perspectives on email consultations and the large data set are strengths of the study.
- In addition, it is a strength that the perspectives of both GPs and patients are represented.
- A potential limitation is that the majority of patients interviewed were born in 1954 or earlier (65+ years), but they were included as they participate in email consultations with the highest frequency in Denmark.

## INTRODUCTION

Email consultations are online consultations that allow general practitioners (GPs) and patients to communicate via e-mail without requiring their physical and/or temporal co-presence<sup>1-4</sup>. Email consultations, which are intended to supplement rather than replace the dyadic encounter in the clinical setting, take place through closed messaging systems that encrypt the exchanges and integrate them into patients' medical records. Uptake of this relatively new form of consultation is contingent on aspects such as political will, technical infrastructures, and the motivation and resources of GPs and patients<sup>4 5</sup>. The use of email consultations by patients varies considerably among general practices when it comes to frequency and purpose<sup>6</sup>.

A literature review on patients' perspectives on email consultations<sup>7</sup> found that patients identified greater access to their GPs as one of email consultations' main advantages. Patient access to healthcare is highly topical as aging populations mean that healthcare systems often strain to meet the growing demand for healthcare<sup>8</sup>. GPs in the Danish context, which is our present concern, are required to see increasing numbers of patients<sup>9</sup>, and Danish patients often struggle to see their GPs at the clinic due to GPs' heavily booked schedules<sup>10</sup>. A sense of inaccessibility may be exacerbated by spatial and physical aspects of the clinical setting, as access is mediated by the gatekeeping role of secretaries, having to wait in a waiting room and the length of the consultation, including GPs' own (need for) time management<sup>11-13</sup>. Commonly reported advantages for GPs include reduced phone load and increased efficiency in administration<sup>14</sup>.

1  
2  
3 In Denmark, general practice serves as a first-contact access point to the fully tax-financed  
4 Danish healthcare system that offers almost all services free of charge to citizens. In 2009, a  
5 collective agreement made it mandatory for all Danish GPs to offer email consultations to  
6 “increase efficiency and quality through the digitisation of health care”<sup>15</sup>. Email consultations  
7 were introduced as a cost-effective, convenient means of providing access to GPs, primarily for  
8 communication of test results and short questions that could be answered briefly and resolved  
9 without the patient being present. In Denmark, email consultation use has increased steadily  
10 since its introduction. A recent study found that Denmark had the highest numbers of doctor-  
11 patient emails sent/received in Europe<sup>5</sup>, making it a forerunner in the adoption of email  
12 consultations and thus an important case to investigate. By 2019, the number of email  
13 consultations in Denmark had risen from 1.3 million in 2008 to 7.2 million per year,  
14 corresponding to just under 21% of all GP consultations<sup>16</sup>.

15  
16  
17  
18  
19  
20  
21  
22  
23  
24  
25  
26 Currently, six different software systems (websites and apps) are used in Danish GP clinics to  
27 manage email consultations. Clinics decide on which system to use, the amount of text that  
28 patients can produce and whether pictures can be uploaded. The potential for patients having  
29 greater access to GPs is underlined on the websites of Danish GP practices; patients are, for  
30 example, told that they can use email consultations to contact their GP “24/7” and “day and  
31 night”, emphasizing the possibility of round-the-clock, direct, and patient-instigated access to  
32 GPs.  
33  
34  
35  
36  
37  
38

39  
40  
41  
42  
43  
44  
45  
46  
47  
48  
49  
50  
51  
52  
53  
54  
55  
56  
57  
58  
59  
60  
Against this backdrop, we address the following research question: *How do patients and GPs in the Danish setting perceive the communicative advantages and disadvantages of the access that the medium of email consultation provides?* We explore both patients’ and GPs’ perspectives in order to achieve a fuller understanding of the implications of email consultations for doctor-patient communication, and address the research question using qualitative interview data.

The theoretical frame that guides our analysis derives from medium theory, a perspective that focuses on the potential impact of media *per se* beyond the content that they convey<sup>17</sup>. We interpret email consultations as involving a communication *medium* that facilitates access between patients and GPs. Communication and media scholars refer to a medium’s “affordances”, meaning the different ways in which users employ a medium<sup>18 19</sup> and how a

1  
2  
3 medium's possibilities are perceived by its users<sup>20</sup>. The concept of affordance helps us identify  
4 the limitations and strengths of the medium's materiality, i.e. physical properties that have  
5 consequences for how the medium is used (including what we conceive of a medium)<sup>21</sup>, also  
6 referred to as its affordances or *action potentials*<sup>22</sup>. Action potentials point both to the  
7 environment and to the observer and should not be studied purely objectively in terms of  
8 technical aspects or purely subjectively in terms of users' perspectives; instead, they are best  
9 considered as an interplay between humans and technology<sup>23</sup> that enhance our understanding of  
10 how technology is applied and perceived<sup>24-28</sup>. More specifically, one recognised action potential  
11 of e-mails is asynchronous production<sup>23 29</sup>, i.e. the possibility of planning, producing, sending  
12 and reading digital messages without the presence of the other participant(s) in the  
13 communication. Using e-mail can be perceived differently depending on factors such as user  
14 expectations and context. In order to understand how the affordances of asynchronous  
15 production shape the interplay between technology and users, interview data are thus highly  
16 appropriate.

## 30 METHOD

31  
32 This paper draws from a larger qualitative study of email consultations in general practice. The  
33 project includes five subprojects that each address key aspects of email consultations:  
34 technology, content and relations. The larger project involves a focused empirical analysis of  
35 email consultations and perceptions of such consultations from different theoretical perspectives.

### 40 Data collection

41 The data set we analyse in this article stems from two of the five subprojects and consists of  
42 semi-structured interviews with 30 patients and 23 GPs. The data were collected from February  
43 2016 to September 2019. See Table 1 for an overview of the interview participants.

| Interviews | Number of participants | Gender |      | Age span |
|------------|------------------------|--------|------|----------|
|            |                        | Female | Male |          |
| Patients   | 30                     | 18     | 12   | 40-91    |

|                            |           |           |           |       |
|----------------------------|-----------|-----------|-----------|-------|
|                            |           |           |           |       |
| GPs                        | 23        | 12        | 11        | 37-70 |
| <b>Participants, total</b> | <b>53</b> | <b>30</b> | <b>23</b> |       |

**Table 1: Overview of interviews**

30 patients (18 women and 12 men), aged between 40-91 years, were interviewed individually or as a couple. All patients were recruited via their GPs through an open call communicated by word of mouth in our professional network within the Region of Southern Denmark, one of Denmark's five geographically defined regions. The interviews were conducted face-to-face in a setting of the patients' own choosing such as their homes (23), a senior activity house (5) and a public library (2).

When selecting GPs for the individual interviews, the aim was to achieve variation with respect to the GPs' age, gender, practice type, geographical location and years of practice as a GP. The GPs lived and worked within four of Denmark's five regions: the Region of Southern Denmark (17), the Central Denmark Region (4), the North Denmark Region (1), and the Capital Region of Denmark (1), thus including both urban and rural areas. The interviews with the GPs were conducted either face-to-face (15) or by telephone (8) and lasted between 10:53 and 78:23 minutes.

All interviews were conducted by AG and EAH. Semi-structured interview guides included open-ended questions such as "What are the communicative advantages of the email consultation, in your opinion?", "What are the communication challenges?" and "In what ways, if any, do email consultations impact on your relationship with patients/your GP, in your opinion?" Recruitment of interviewees continued until sufficient information power (also often referred to as "saturation") regarding the subject at hand was achieved<sup>30</sup>.

### **Data analysis**

The interviews were transcribed verbatim and coded using the software program NVivo 12. The first and second authors, AG and EAH, coded the transcripts in two phases: an initial open coding and a subsequent closed thematic coding using a node structure that reflected identified themes and subthemes and allowed for expansion and reduction along the way. The analytical

1  
2  
3 process was inspired by Kozinets' netnographic approach<sup>31</sup> and included coding, note-taking,  
4 abstracting/comparing, checking and refining. All authors compared and discussed the identified  
5 themes, relating them to the original transcripts and aligning them where necessary. This  
6 analytical work was carried out in a dialectic (abductive) process where we went inductively  
7 from the empirical examples in the interviews to the theoretical concepts, and deductively from  
8 the theoretical concepts to the empirical examples from the interviews.  
9

### 14 **Patient and public involvement**

15 There was no direct involvement of patients or the public in the design of the present study.  
16  
17  
18  
19

## 20 **RESULTS**

### 23 **Affordances of email consultation as a communication medium**

24 Focusing on email consultations as a communication medium, we found that the most prominent  
25 affordances derived from the thematic analysis were: 1) lower contact threshold, 2) accessing a  
26 new interaction space and 3) access to access (quicker access to face-to-face consultations).  
27 From the perspective of the patients and GPs, these three affordances of email consultations  
28 involved communicative advantages and disadvantages relating to doctor-patient  
29 communication. In the following, we present the three affordances as perceived by patients and  
30 GPs, respectively.  
31  
32  
33  
34  
35  
36  
37

#### 38 **Lower contact threshold**

##### 39 **Patient perspective**

40  
41 With respect to lower contact threshold, the technical affordance 'asynchronicity' (cf. section 1,  
42 Introduction) was key. Many patients stated that they were happy not to have to attend the clinic  
43 in person as they found that email consultations were more convenient than going to see the  
44 doctor. The patients emphasized that they did not want to be any bother, and that email  
45 consultations felt less disruptive than face-to-face consultations. For example, one patient said, "I  
46 don't want to be any trouble because it's probably nothing", and another, when asked why she  
47 preferred email consultations stated: "Because [that way] you are not any trouble. They answer  
48 when they have time".  
49  
50  
51  
52  
53  
54  
55  
56  
57  
58  
59  
60

1  
2  
3 Patients appreciated close contact with their GP which they considered to be facilitated by email  
4 consultations. At the same time, they knew that GPs are busy as they have many other patients to  
5 take care of. As one patient stated, “I also think that by using email consultations, it must take  
6 some of the pressure off [the doctor] in [face-to-face] consultations”. Several patients considered  
7 their GP’s workflow and mentioned that if they sent an email consultation message in the  
8 morning, the GP would answer in the afternoon or the next morning, at the latest. Thus, patients  
9 perceived email consultations as less disturbing for GPs, which made it easier for them to  
10 communicate with their GP without feeling stressed or under time pressure.  
11  
12  
13  
14  
15  
16  
17  
18

### 19 GP perspective

20  
21 The affordance of technical asynchronicity was thematized recurrently by the GPs as one of the  
22 great advantages of email consultations for both patients and GPs: “The advantage is that people  
23 can write whenever they want, at night, in the evening, when they are off work and have the  
24 time, and the advantage for me as a doctor is that I can look at their inquiries when I have the  
25 time”. Many GPs associated the introduction of email consultations in general practice with a  
26 “lower contact threshold”, where quick, convenient access was made possible for patients who  
27 otherwise might have had difficulties attending the clinic, for example, due to late working  
28 hours, long travel distances or mental health issues. One GP described how email consultations  
29 had facilitated increased contact and relationship-building with vulnerable patients, e.g. those  
30 suffering from Asperger’s syndrome or autism, who might be reluctant to see their GP in the  
31 clinic due to their life circumstances.  
32  
33  
34  
35  
36  
37  
38  
39  
40

41 Downsides of a “lower contact threshold” were also mentioned by some GPs. Easy, untriaged  
42 access to GPs in some clinics had led to overuse of email consultations, with some patients  
43 burdening GPs with high volumes of e-mail correspondence. As one GP put it:  
44  
45  
46

47 As 8,000 patients have round-the-clock access to us, we receive an enormous number of  
48 e-mails. For some reason, there are some doctors whom patients feel a strong affinity for,  
49 and those doctors receive many more e-mails than the others. The emails are not  
50 distributed [between us] because they are not triaged. This kind of untriaged access  
51 overloads some.  
52  
53  
54  
55  
56  
57  
58  
59  
60

1  
2  
3 Furthermore, given the direct access facilitated by email consultations and the fact that GPs are  
4 obliged to respond to every email consultation, some GPs narrated that some patients, who  
5 seemed unsure of where else to turn, used email consultations to address issues that extended  
6 beyond the scope of general practice:  
7  
8  
9

10  
11 Now you can write to your doctor 24/7, and they have to answer. I mean, many things  
12 end up here where I just think, “This has absolutely nothing to do with medical practice”.  
13  
14 But you can see that they don’t know where to ask their question, and you spend time on  
15 it anyway.  
16  
17  
18  
19

## 20 21 **A new interaction space is accessible**

### 22 23 Patient perspective

24  
25 The non-physical shared contact space of email consultations broke the traditional association  
26 between social presence and physical proximity, creating a new form of mutual presence or co-  
27 access. For patients, email consultations were perceived as facilitating new conversations with  
28 their GP, which gave them peace of mind. Most patients found that they could ask their GP about  
29 anything in email consultations including their worries and concerns. When asked if email  
30 consultations would weaken their relationship with the GP because of its more formal framing  
31 and written form, one patient stated:  
32  
33  
34  
35  
36  
37

38 Not at all, quite the opposite. [...] If you have it in writing, you can read it, and you can  
39 read it again, because you might have forgotten details. So, for me, it is an advantage [...] Because when talking, there might be something you can’t remember because there are  
40  
41  
42  
43  
44  
45  
46  
47  
48  
49  
50  
51  
52  
53  
54  
55  
56  
57  
58  
59  
60

56  
57 The written form meant that patients could access and re-access the interaction space without the  
58 GP being present at the same time. For patients, this created a safe feeling, and it was highly  
59 valued by patients that they could access a space that permanently documented their  
60 communication with their GP.

Some patients emphasised that the access to their GPs facilitated by email consultations



1  
2  
3 promoted a clear and straightforward form of communication:  
4

5           Of course, we are emotional beings, but if we strip it [communication] of emotional talk,  
6           it is very concrete. Does my knee hurt or not? Can I stretch my leg or not? I mean, that is  
7           the way my brain works.  
8  
9

10  
11  
12 Others, on the other hand, liked writing personal and emotional messages to their GP, and found  
13 it easy to raise challenging topics by e-mail. Email consultations facilitated a new way of  
14 gathering one's thoughts, as this patient explained:  
15  
16

17           I thought that it must be possible to gather my thoughts in a different way [...]. When it  
18           became possible to write to them, I wrote, "Sleeping is not going well. I don't feel like  
19           taking the sleeping pills you gave me because I don't want to deal with the side effects.  
20           Are there other options?", and then I get a response. And it is always quick, and it is  
21           concrete. It is very concrete, and I am forced to think in a very concrete way.  
22  
23  
24  
25  
26  
27

## 28 GP perspective

29  
30 Regarding the co-access facilitated by email consultations, many GPs stated that they  
31 appreciated email consultation communication because of its brevity and precision. Compared to  
32 telephone consultations, email consultations were perceived as compelling patients as well as  
33 GPs to communicate effectively: "What I really like about email is that it forces both parties to  
34 be brief and a little more precise". Moreover, email consultations were perceived by GPs as  
35 providing patients with the opportunity to reflect on their communication, resulting in more  
36 considered and constructive communication: "I think the strength of email is that when they ask  
37 me something, they have thought about what they want to ask about".  
38  
39  
40  
41  
42  
43  
44

45 Email consultations were also experienced by GPs as facilitating access to new forms of  
46 affective communication. For example, if patients were dissatisfied with their care, GPs deemed  
47 email consultations to be a good medium for patients' expression of critique:  
48  
49  
50

51           If they are unsatisfied about something, they are afraid to say upfront... I have found that  
52           a couple of times you receive an email where they write and tell you what they are  
53  
54  
55  
56  
57  
58  
59  
60

1  
2  
3           unsatisfied with. That way, they have given it a lot of thought. [...] So, it is really good  
4           for that purpose, and it opens up possibilities.  
5  
6

7 Furthermore, GPs found that email consultations could facilitate emotional disclosure to a  
8 greater extent than face-to-face consultations. Patients were able to write to their GP in the  
9 moment of affect (e.g. anxiety, stress, anger and happiness), in the knowledge that the GP would  
10 respond at some point. Several examples were provided by the GPs of how their patients shared  
11 their feelings with them, e.g. if they were feeling miserable or better in the direct aftermath of a  
12 treatment or social gathering.  
13  
14  
15  
16  
17

## 21 **Access to access**

### 23 Patient perspective

24  
25 Compared to telephone and face-to-face consultations, patients found email consultations to be  
26 easier, more direct and most importantly, untriaged. The patients did not meet a “gatekeeping  
27 function” in the guise of a medical secretary or a nurse, nor did they experience delays in getting  
28 their message across. In that sense, email consultations were perceived as a means of dealing  
29 with a situation directly. If a problem could not be solved via an email consultation, email  
30 consultations could expedite the booking of a clinical appointment. One patient described the  
31 improved access to their GP as follows: “Because I mean, you can't – after all, you don't come  
32 directly in contact with the doctor, it's through the nurses up there, right? [...] If I have to go to  
33 the doctor, I write.”  
34  
35  
36  
37  
38  
39  
40  
41  
42

43 Moreover, the patients stated that if GPs deemed the content of a patient's email consultation  
44 message to be unclear or in other ways too complicated to answer directly, he/she typically  
45 recommended a physical consultation. Sometimes, GPs booked an appointment time and  
46 included information about it in the email consultation response. In that way, patients perceived  
47 that they got access to access (face-to-face consultation) more quickly than if they phoned. One  
48 patient explained as follows:  
49  
50  
51  
52  
53

54           I just wrote to him, and I got an appointment. And it was easier to get an appointment  
55  
56  
57  
58  
59  
60

1  
2  
3 directly with him than it is if you book online because then it is several months away. I  
4 got an appointment the next day every time.  
5  
6  
7

8 Another patient emphasized the usefulness of getting their GP's initial assessment of a situation  
9 via email consultations:  
10

11  
12  
13 And that is also okay, because then they can judge "There must be something, let's get  
14 her down here and look at it". If they had judged "That is nothing", then they would just  
15 write "You don't have to worry about that".  
16  
17  
18

19  
20 Thus, after the email consultation, the patient knew if the GP considered a physical consultation  
21 to be necessary.  
22  
23

#### 24 25 GP perspective

26  
27 Reflecting patients' experiences of how email consultations facilitated quick access to access, the  
28 GPs discussed how patients used email consultations as a way of bypassing waiting lists:  
29 "Because sometimes, it is because they want to squeeze themselves in because they can't get an  
30 appointment."  
31  
32  
33

34  
35 Furthermore, GPs described how email consultations were used by some patients to "test the  
36 water", checking with their GP whether their health problem elicited a "wait and see" or "book  
37 an appointment immediately" response:  
38  
39  
40

41 Sometimes, someone asks about a certain issue, "Do I need an appointment?" And it can  
42 be anything from giving them advice and saying, "You can just wait and see" or "You  
43 need an acute appointment for that – you should call and get one today".  
44  
45  
46

47 According to some GPs, these kinds of email consultations could be redundant or wasteful as  
48 they would very often elicit responses of the type: "We need to see you, you have to come in",  
49 meaning "What you are presenting, we can't deal with via email"; one GP estimated that they  
50 redirected "one third" of their email consultations to face-to-face consultations. However, in  
51 other cases, email consultations could increase effectiveness: "There are definitely some where  
52  
53  
54  
55  
56  
57  
58  
59  
60

1  
2  
3 we say, “You don’t need to come in, you will get a prescription”. Like, threadworms, I don’t  
4 need to see that.”  
5  
6  
7

## 8 9 **DISCUSSION AND CONCLUSION**

### 10 11 **Discussion**

12  
13 In this article, we explored a large qualitative data set of interviews to investigate GPs’ and  
14 patients’ perspectives on the communicative advantages and disadvantages of email  
15 consultations as a medium for accessing each other. We drew on a media-theoretical framework,  
16 focusing on the concept of affordances, as we wanted to shed light on what the *medium* meant  
17 for perceived communicative advantages and disadvantages of this still relatively new form of  
18 patient-doctor consultation. Three affordances were evident in the subsets of data on doctors’ and  
19 patients’ perspectives: email consultations were associated with a *lower contact threshold*, the  
20 availability of a *new interaction space*, and *access to access*. These affordances are important as  
21 they say something about the primary characteristics of email consultations as interpreted by  
22 their users. They may also be relevant for other forms of e-mediated communication in  
23 healthcare such as doctor-patient online forums; however, further studies would be required to  
24 explore this. As pointed out by Mold et al. (2019) in their review of 57 electronic consultation  
25 studies in primary care, remote care includes many other forms of communication than email  
26 (e.g. telephone, video, text messaging, web-based portals etc.) and research in this area  
27 recognizes this heterogeneity<sup>8</sup>.  
28  
29  
30  
31  
32  
33  
34  
35  
36  
37  
38  
39  
40

41 Many of our findings on GPs’ and patients’ perspectives on email consultation communication  
42 resonate with those of previous studies. Patients in our study appreciated the lower contact  
43 threshold to their GPs. Similarly, in previous research, patients liked being able to contact their  
44 GPs from the convenience of their own homes at times that suited them<sup>2 32</sup>.  
45  
46  
47  
48  
49

50 Similar to other studies<sup>33-35</sup>, patients in our study welcomed having time in email consultations to  
51 reflect over their accounts of their health concerns. In our data, patients’ and GPs’ appreciation  
52 of the brief, matter-of-fact communication of email consultations reflects the leanness associated  
53 with the medium of e-mail<sup>36</sup>. However, we also found that email consultations make it easier for  
54  
55  
56  
57  
58  
59  
60

1  
2  
3 patients to write than talk about sensitive or emotional topics, suggest their own hypotheses for  
4 discussion, and ask questions, which resonates with previous findings<sup>32 37-41</sup>. Moreover, in  
5 previous research, doctors have reported that when used appropriately for relatively  
6 straightforward tasks (e.g. prescription refills and information sharing regarding medication or  
7 treatments), email consultations can impact the doctor-patient relationship positively and  
8 improve continuity of care<sup>42 43</sup>. Patients in our study anticipated that the time used on email  
9 consultations might mean more time for consultations in the clinic.  
10  
11  
12  
13  
14  
15

16  
17 Doctors have voiced their concerns about the potentially negative effects of email consultations  
18 on workload, compensation and litigation<sup>7 44</sup> and that email consultations grant patients untriaged  
19 access<sup>43</sup>. We found similar results in our data related to GPs' concerns about access to access,  
20 whereas patients were pleased about untriaged access to their GPs.  
21  
22  
23  
24

25  
26 What our article offers with respect to previous studies is a framework for interpreting doctors'  
27 and patients' perspectives that links to the medium of email consultations. The findings  
28 presented in this article are therefore not "just" advantages and disadvantages of email  
29 consultations; rather, they represent advantages and disadvantages of perceived affordances of  
30 the medium of email consultations, i.e. e-mail. The lack of a concerted medium-based focus in  
31 previous research on email consultations misses the critical aspect of email consultations as  
32 occurring in a different medium to the clinical dyad. As we have shown in our article, email  
33 consultations permit access that is de-coupled from time and space which significantly impacts  
34 the communication that is possible between patients and doctors.  
35  
36  
37  
38  
39  
40  
41  
42

43 A strength of our study is the theoretical framework that draws on affordance theory coupled  
44 with a qualitative approach that involves deductive and inductive approaches; we suggest that  
45 this could be useful for other studies exploring emerging communicative practices that use new  
46 media in healthcare settings. Besides our theoretical approach, other strengths of this study  
47 include the use of interviews to investigate perspectives on email consultations and a large data  
48 set. In addition, we see it as very valuable that the perspectives of both GPs and patients are  
49 included in our study of the affordances of the medium of email consultations.  
50  
51  
52  
53  
54  
55  
56  
57  
58  
59  
60

1  
2  
3 A potential limitation of the study is that the majority of patients represented were born in 1954  
4 or earlier (> 65 years) which might influence the results. Thus, our findings might not be  
5 generalizable to all age groups. Moreover, there is a need for further studies in different countries  
6 as our findings are likely to be inflected by the local Danish context (e.g. the triage system may  
7 operate differently). Finally, we also need to highlight the likelihood that as our patient  
8 interviewees were those who chose to use email consultations, they may be quite technology-  
9 savvy and thus not be representative of the general population.  
10  
11  
12  
13  
14  
15  
16  
17

## 18 **Conclusion**

19  
20 This study adds knowledge of how the affordances of the medium of email consultation may  
21 impact access in doctor-patient communication. Communication may not only be more frequent  
22 (lower contact threshold), it may also give rise to very different communicative practices as  
23 witnessed by the affordances of the availability of a new interaction space. Moreover, email  
24 consultations facilitate access to access as patients have a new means of gaining face-to-face  
25 access to their GPs. Email consultations thus do not simply extend existing forms of contact and  
26 consultation (face-to-face and telephone); they produce a new communication space with its own  
27 affordances which result in new practices. With increasing use of email consultations, it is  
28 important to be alert to the possibility that email consultations may involve new roles for patients  
29 and GPs, and that there may be challenges involved in transferring some GP-patient  
30 communication to the written medium. To keep pace with such developments, we argue, like  
31 Schiller<sup>45</sup>, that the knowledge and skill sets that could help manage the communicative demands  
32 of email consultations should be reflected in doctors' education. Also, at policy level, there  
33 should be greater awareness that email consultations may add extra tasks to GPs, as although  
34 email consultations have been promoted to improve effectiveness in healthcare systems, they  
35 may increase work strain on GPs.  
36  
37  
38  
39  
40  
41  
42  
43  
44  
45  
46  
47  
48

## 49 **Acknowledgements**

50  
51  
52 We would like to thank all the patients and the GPs who participated in our study. We would  
53 also like to thank student assistant Karoline Søberg for all her administrative help.  
54  
55  
56  
57  
58  
59  
60

## Contributors

All authors (AG, EAH, MNB, AFB) have substantially contributed to the formulation of the research question and design of the study. All interviews were conducted by AG and EAH. The first and second authors, AG and EAH, coded the transcripts in two phases (open and thematic). All authors compared and discussed the identified themes, relating them to the original transcripts and aligning them where necessary. All authors have contributed to the process of writing the article, including proof-reading.

## Funding

The present study was supported by a grant from the VELUX FOUNDATIONS [grant number 18158], and an AUFF Starting Grant [AUFF-E-2015-FLS-7-30].

## Competing Interests

None declared.

## Patient consent for publication

Not required.

## Ethics approval

All participants gave written consent and were informed that participation in the study was voluntary. The study was approved by the institutional review board of the University of Southern Denmark, the Research and Innovation Organization (RIO) (Journal no. 10457) and was conducted in accordance with the General Data Protection Regulation (GDPR) and the Declaration of Helsinki.

## Data sharing statement

We do not have ethics approval to share raw data from our interviews.

## References

1. Andreassen HK. What does an e-mail address add?-Doing health and technology at home. *Social science & medicine* 2011;72(4):521-28.
2. Ball MJ, Lillis J. E-health: transforming the physician/patient relationship. *International journal of medical informatics* 2001;61(1):1-10.
3. Recupero PR. E-mail and the psychiatrist-patient relationship. *Journal of the American Academy of Psychiatry and the Law Online* 2005;33(4):465-75.
4. Ye J, Rust G, Fry-Johnson Y, et al. E-mail in patient-provider communication: A systematic review. *Patient education and counseling* 2010;80(2):266-73.
5. Newhouse N, Lupiáñez-Villanueva F, Codagnone C, et al. Patient use of email for health care communication purposes across 14 European countries: an analysis of users according to demographic and health-related factors. *Journal of medical internet research* 2015;17(3):e58.
6. Fagerlund AJ, Holm IM, Zanaboni P. General practitioners' perceptions towards the use of digital health services for citizens in primary care: a qualitative interview study. *BMJ Open* 2019;9(5):e028251. doi: 10.1136/bmjopen-2018-028251
7. Fage-Butler AM, Nisbeth Jensen M. Medical terminology in online patient-patient communication: evidence of high health literacy? *Health Expectations* 2016;19(3):643-53.
8. Mold F, HENDY J, Lai Y, et al. Electronic Consultation in Primary Care Between Providers and Patients: Systematic Review. *JMIR Med Inform* 2019;Dec 3;7(4) doi: 10.2196/13042.
9. Seier K. Praktiserende læger har flere patienter end nogensinde før [GPs have more patients than ever before] 2018 [updated 28.08.2018. Available from: <https://www.dr.dk/nyheder/regionale/nordjylland/praktiserende-laeger-har-flere-patienter-ud-nogensinde-foer> accessed 31.01.2020.
10. Kert K, Flach AS. Kø i venteværelset: Antallet af patienter per læge har aldrig været så højt [Queue in the waiting room: The number of patients per doctor has never been so high] 2019 [updated 16.01.2019. Available from: <https://www.dr.dk/nyheder/regionale/hovedstadsomraadet/koe-i-ventevaerlset-antallet-af-patienter-laege-har-aldrig> accessed 31.01.2020.
11. Gillespie R. Architecture and power: a family planning clinic as a case study. *Health & place* 2002;8(3):211-20.
12. Martin D, Nettleton S, Buse C, et al. Architecture and health care: a place for sociology. *Sociology of health & illness* 2015;37(7):1007-22.
13. Lupton D. *Medicine as Culture: Illness, disease and the body*. London: Sage 2012.
14. Huygens MW, Swinkels IC, Verheij RA, et al. Understanding the use of email consultation in primary care using a retrospective observational study with data of Dutch electronic health records. *BMJ open* 2018;8(1):e019233.
15. PLO. Praktiserende Lægers Organisation [The Danish Organization of General Practitioners]. Lægernes overenskomst om almen praksis [Doctor's agreement], 2010.
16. PLO. Praktiserende Lægers Organisation [The Danish Organization of General Practitioners]. Aktivitet og økonomi i almen praksis i dagtid og vagttid 2007 til 2019. [Activity and economy in General Practice 2007-2019]. 2019 [Available from: [https://www.laeger.dk/sites/default/files/aktivitet\\_og\\_oekonomi\\_2019.pdf](https://www.laeger.dk/sites/default/files/aktivitet_og_oekonomi_2019.pdf) accessed 4th of August 2020.
17. Meyrowitz J. *No sense of place: The impact of electronic media on social behavior*: Oxford University Press 1986.



18. Gibson JJ. The theory of affordances. In: Shaw R, Bransford J, eds. *Perceiving, acting and knowing: Toward an ecological psychology*. Hillsdale, New Jersey Lawrence Erlbaum Associates 1977.
19. Gibson JJ. *The Ecological Approach to Perception*. London Houghton Mifflin 1979.
20. Norman D. *The design of everyday things*: London: MIT Press, 1990.
21. Hutchby I. Technologies, Texts and Affordances. *Sociology* 2001;35(2):441-56.
22. Majchrzak A, Markus ML. Technology affordances and constraints in management information systems (MIS). *Encyclopedia of Management Theory*, (Ed: E Kessler), Sage Publications, Forthcoming 2012
23. Grønning A. *Digitale samtaler*. Frederiksberg: Samfundslitteratur 2018.
24. Vaast E, Kaganer E. Social media affordances and governance in the workplace: An examination of organizational policies. *Journal of Computer-Mediated Communication* 2013;19(1):78-101. doi: 10.1111/jcc4.12032
25. Fayard A-L, Weeks J. Who Moved My Cube? *Harvard Business Review* 2011;89(7/8):102-10.
26. Leonardi PM. When flexible routines meet flexible technologies: Affordance, constraint, and the imbrication of human and material agencies. *MIS quarterly* 2011:147-67.
27. Leonardi PM, Barley SR. What's under construction here? Social action, materiality, and power in constructivist studies of technology and organizing. *Academy of Management Annals* 2010;4(1):1-51.
28. Markus ML, Silver MS. A foundation for the study of IT effects: A new look at DeSanctis and Poole's concepts of structural features and spirit. *Journal of the Association for Information systems* 2008;9(10):5.
29. Grønning A. *Personen bag: Tilstedevær i e-mail som interaktionsform mellem kunde og medarbejder i dansk forsikringskontekst*. København: Samfundslitteratur 2006.
30. Malterud K, Siersma VD, Guassora AD. Sample size in qualitative interview studies: guided by information power. *Qualitative health research* 2016;26(13):1753-60.
31. Kozinets RV. Netnography. *The international encyclopedia of digital communication and society* 2015:1-8.
32. Baur C. Limiting factors on the transformative powers of e-mail in patient-physician relationships: a critical analysis. *Health communication* 2000;12(3):239-59.
33. Atherton H, Pappas Y, Heneghan C, et al. Experiences of using email for general practice consultations: a qualitative study. *Br J Gen Pract* 2013;63(616):e760-e67.
34. Hansen CS, Christensen KL, Ertmann R. Patients and general practitioners have different approaches to e-mail consultations. *Dan Med J* 2014;61(6):A4863.
35. Hartgers M, Jatoi A. E-Mail and photographs: A case report of a patient-initiated diagnostic tool in the era of electronic communication. *Journal of palliative medicine* 2010;13(3):335-37.
36. Rethinking media richness: Towards a theory of media synchronicity. Proceedings of the 32nd Annual Hawaii International Conference on Systems Sciences 1999 HICSS-32 Abstracts and CD-ROM of Full Papers; 1999. IEEE.
37. Lee SA, Zuercher RJ. A current review of doctor-patient computer-mediated communication. *Journal of Communication in Healthcare* 2017;10(1):22-30.
38. Roter DL, Larson S, Sands DZ, et al. Can e-mail messages between patients and physicians be patient-centered? *Health communication* 2008;23(1):80-86.

- 1  
2  
3 39. Tjora A, Tran T, Faxvaag A. Privacy vs usability: a qualitative exploration of patients'  
4 experiences with secure Internet communication with their general practitioner. *Journal*  
5 *of Medical Internet Research* 2005;7(2):e15.  
6  
7 40. Zandbelt LC, de Kanter FE, Ubbink DT. E-consulting in a medical specialist setting:  
8 Medicine of the future? *Patient education and counseling* 2016;99(5):689-705.  
9  
10 41. Assing Hvidt E, Søndergaard J, Klausen M, et al. Not just an information-delivery tool:  
11 Experiences with the relational potential of email consultation among general  
12 practitioners. *Scand J Prim Health Care* 2020;accepted/in press.  
13  
14 42. Moyer CA, Stern DT, Dobias KS, et al. Bridging the electronic divide: patient and provider  
15 perspectives on e-mail communication in primary care. *The American journal of*  
16 *managed care* 2002;8(5):427-33.  
17  
18 43. Patt MR, Houston TK, Jenckes MW, et al. Doctors who are using e-mail with their patients: a  
19 qualitative exploration. *Journal of Medical Internet Research* 2003;5(2):e9.  
20  
21 44. Car J, Sheikh A. Email consultations in health care: 2—acceptability and safe application.  
22 *Bmj* 2004;329(7463):439-42.  
23  
24 45. Schiller JH, Christner JG, Stansfield RB, et al. What parents want from emails with their  
25 pediatrician: Implications for teaching communication skills. *Patient education and*  
26 *counseling* 2013;92(1):61-66.  
27  
28  
29  
30  
31  
32  
33  
34  
35  
36  
37  
38  
39  
40  
41  
42  
43  
44  
45  
46  
47  
48  
49  
50  
51  
52  
53  
54  
55  
56  
57  
58  
59  
60

# Reporting checklist for qualitative study.

Based on the SRQR guidelines.

## Instructions to authors

Complete this checklist by entering the page numbers from your manuscript where readers will find each of the items listed below.

Your article may not currently address all the items on the checklist. Please modify your text to include the missing information. If you are certain that an item does not apply, please write "n/a" and provide a short explanation.

Upload your completed checklist as an extra file when you submit to a journal.

In your methods section, say that you used the SRQR reporting guidelines, and cite them as:

O'Brien BC, Harris IB, Beckman TJ, Reed DA, Cook DA. Standards for reporting qualitative research: a synthesis of recommendations. Acad Med. 2014;89(9):1245-1251.

|              |                                                                                                                                                                                                                                                                | Page   |
|--------------|----------------------------------------------------------------------------------------------------------------------------------------------------------------------------------------------------------------------------------------------------------------|--------|
|              | Reporting Item                                                                                                                                                                                                                                                 | Number |
| <b>Title</b> | <p><a href="#">#1</a> Concise description of the nature and topic of the study identifying the study as qualitative or indicating the approach (e.g. ethnography, grounded theory) or data collection methods (e.g. interview, focus group) is recommended</p> | 1      |

## Abstract

[#2](#) Summary of the key elements of the study using the abstract format of the intended publication; typically includes background, purpose, methods, results and conclusions

## Introduction

Problem formulation [#3](#) Description and significance of the problem / phenomenon studied: review of relevant theory and empirical work; problem statement

Purpose or research question [#4](#) Purpose of the study and specific objectives or questions

## Methods

Qualitative approach and research paradigm [#5](#) Qualitative approach (e.g. ethnography, grounded theory, case study, phenomenology, narrative research) and guiding theory if appropriate; identifying the research paradigm (e.g. postpositivist, constructivist / interpretivist) is also recommended; rationale. The rationale should briefly discuss the justification for choosing that theory, approach, method or technique rather than other options available; the assumptions and limitations implicit in those choices and how those choices influence study conclusions and transferability.

As appropriate the rationale for several items might be discussed together.

|    |                           |                     |                                                           |
|----|---------------------------|---------------------|-----------------------------------------------------------|
| 1  |                           |                     |                                                           |
| 2  |                           |                     |                                                           |
| 3  |                           |                     |                                                           |
| 4  |                           |                     |                                                           |
| 5  |                           |                     |                                                           |
| 6  | Researcher                | <a href="#">#6</a>  | Researchers' characteristics that may influence the       |
| 7  |                           |                     |                                                           |
| 8  | characteristics and       |                     | research, including personal attributes, qualifications / |
| 9  |                           |                     |                                                           |
| 10 | reflexivity               |                     | experience, relationship with participants, assumptions   |
| 11 |                           |                     | and / or presuppositions; potential or actual interaction |
| 12 |                           |                     | between researchers' characteristics and the research     |
| 13 |                           |                     | questions, approach, methods, results and / or            |
| 14 |                           |                     | transferability                                           |
| 15 |                           |                     |                                                           |
| 16 |                           |                     |                                                           |
| 17 |                           |                     |                                                           |
| 18 |                           |                     |                                                           |
| 19 |                           |                     |                                                           |
| 20 |                           |                     |                                                           |
| 21 |                           |                     |                                                           |
| 22 | Context                   | <a href="#">#7</a>  | Setting / site and salient contextual factors; rationale  |
| 23 |                           |                     |                                                           |
| 24 |                           |                     |                                                           |
| 25 | Sampling strategy         | <a href="#">#8</a>  | How and why research participants, documents, or          |
| 26 |                           |                     |                                                           |
| 27 |                           |                     | events were selected; criteria for deciding when no       |
| 28 |                           |                     | further sampling was necessary (e.g. sampling             |
| 29 |                           |                     | saturation); rationale                                    |
| 30 |                           |                     |                                                           |
| 31 |                           |                     |                                                           |
| 32 |                           |                     |                                                           |
| 33 |                           |                     |                                                           |
| 34 |                           |                     |                                                           |
| 35 | Ethical issues pertaining | <a href="#">#9</a>  | Documentation of approval by an appropriate ethics        |
| 36 |                           |                     |                                                           |
| 37 | to human subjects         |                     | review board and participant consent, or explanation      |
| 38 |                           |                     | for lack thereof; other confidentiality and data security |
| 39 |                           |                     | issues                                                    |
| 40 |                           |                     |                                                           |
| 41 |                           |                     |                                                           |
| 42 |                           |                     |                                                           |
| 43 |                           |                     |                                                           |
| 44 |                           |                     |                                                           |
| 45 | Data collection methods   | <a href="#">#10</a> | Types of data collected; details of data collection       |
| 46 |                           |                     |                                                           |
| 47 |                           |                     | procedures including (as appropriate) start and stop      |
| 48 |                           |                     | dates of data collection and analysis, iterative process, |
| 49 |                           |                     | triangulation of sources / methods, and modification of   |
| 50 |                           |                     | procedures in response to evolving study findings;        |
| 51 |                           |                     |                                                           |
| 52 |                           |                     |                                                           |
| 53 |                           |                     |                                                           |
| 54 |                           |                     |                                                           |
| 55 |                           |                     |                                                           |
| 56 |                           |                     |                                                           |
| 57 |                           |                     | rationale                                                 |
| 58 |                           |                     |                                                           |
| 59 |                           |                     |                                                           |
| 60 |                           |                     |                                                           |

|    |                         |                     |                                                          |     |
|----|-------------------------|---------------------|----------------------------------------------------------|-----|
| 1  | Data collection         | <a href="#">#11</a> | Description of instruments (e.g. interview guides,       | 4-5 |
| 2  |                         |                     | questionnaires) and devices (e.g. audio recorders)       |     |
| 3  | instruments and         |                     | used for data collection; if / how the instruments(s)    |     |
| 4  |                         |                     | changed over the course of the study                     |     |
| 5  | technologies            |                     |                                                          |     |
| 6  |                         |                     |                                                          |     |
| 7  |                         |                     |                                                          |     |
| 8  |                         |                     |                                                          |     |
| 9  |                         |                     |                                                          |     |
| 10 |                         |                     |                                                          |     |
| 11 | Units of study          | <a href="#">#12</a> | Number and relevant characteristics of participants,     | 5   |
| 12 |                         |                     | documents, or events included in the study; level of     |     |
| 13 |                         |                     | participation (could be reported in results)             |     |
| 14 |                         |                     |                                                          |     |
| 15 |                         |                     |                                                          |     |
| 16 |                         |                     |                                                          |     |
| 17 |                         |                     |                                                          |     |
| 18 |                         |                     |                                                          |     |
| 19 | Data processing         | <a href="#">#13</a> | Methods for processing data prior to and during          | 5   |
| 20 |                         |                     | analysis, including transcription, data entry, data      |     |
| 21 |                         |                     | management and security, verification of data integrity, |     |
| 22 |                         |                     | data coding, and anonymisation / deidentification of     |     |
| 23 |                         |                     | excerpts                                                 |     |
| 24 |                         |                     |                                                          |     |
| 25 |                         |                     |                                                          |     |
| 26 |                         |                     |                                                          |     |
| 27 |                         |                     |                                                          |     |
| 28 |                         |                     |                                                          |     |
| 29 |                         |                     |                                                          |     |
| 30 |                         |                     |                                                          |     |
| 31 | Data analysis           | <a href="#">#14</a> | Process by which inferences, themes, etc. were           | 6   |
| 32 |                         |                     | identified and developed, including the researchers      |     |
| 33 |                         |                     | involved in data analysis; usually references a specific |     |
| 34 |                         |                     | paradigm or approach; rationale                          |     |
| 35 |                         |                     |                                                          |     |
| 36 |                         |                     |                                                          |     |
| 37 |                         |                     |                                                          |     |
| 38 |                         |                     |                                                          |     |
| 39 |                         |                     |                                                          |     |
| 40 |                         |                     |                                                          |     |
| 41 | Techniques to enhance   | <a href="#">#15</a> | Techniques to enhance trustworthiness and credibility    | -   |
| 42 |                         |                     | of data analysis (e.g. member checking, audit trail,     |     |
| 43 | trustworthiness         |                     | triangulation); rationale                                |     |
| 44 |                         |                     |                                                          |     |
| 45 |                         |                     |                                                          |     |
| 46 |                         |                     |                                                          |     |
| 47 |                         |                     |                                                          |     |
| 48 | <b>Results/findings</b> |                     |                                                          |     |
| 49 |                         |                     |                                                          |     |
| 50 |                         |                     |                                                          |     |
| 51 | Syntheses and           | <a href="#">#16</a> | Main findings (e.g. interpretations, inferences, and     | 6-  |
| 52 |                         |                     | themes); might include development of a theory or        |     |
| 53 | interpretation          |                     | model, or integration with prior research or theory      |     |
| 54 |                         |                     |                                                          |     |
| 55 |                         |                     |                                                          |     |
| 56 |                         |                     |                                                          |     |
| 57 |                         |                     |                                                          |     |
| 58 |                         |                     |                                                          |     |
| 59 |                         |                     |                                                          |     |
| 60 |                         |                     |                                                          |     |

|    |                              |                     |                                                          |    |
|----|------------------------------|---------------------|----------------------------------------------------------|----|
| 1  | Links to empirical data      | <a href="#">#17</a> | Evidence (e.g. quotes, field notes, text excerpts,       | 6- |
| 2  |                              |                     | photographs) to substantiate analytic findings           |    |
| 3  |                              |                     |                                                          |    |
| 4  |                              |                     |                                                          |    |
| 5  |                              |                     |                                                          |    |
| 6  | <b>Discussion</b>            |                     |                                                          |    |
| 7  |                              |                     |                                                          |    |
| 8  |                              |                     |                                                          |    |
| 9  |                              |                     |                                                          |    |
| 10 | Intergration with prior      | <a href="#">#18</a> | Short summary of main findings; explanation of how       | 12 |
| 11 | work, implications,          |                     | findings and conclusions connect to, support, elaborate  |    |
| 12 |                              |                     | on, or challenge conclusions of earlier scholarship;     |    |
| 13 | transferability and          |                     | discussion of scope of application / generalizability;   |    |
| 14 |                              |                     | identification of unique contributions(s) to scholarship |    |
| 15 | contribution(s) to the field |                     | in a discipline or field                                 |    |
| 16 |                              |                     |                                                          |    |
| 17 |                              |                     |                                                          |    |
| 18 |                              |                     |                                                          |    |
| 19 |                              |                     |                                                          |    |
| 20 |                              |                     |                                                          |    |
| 21 |                              |                     |                                                          |    |
| 22 |                              |                     |                                                          |    |
| 23 |                              |                     |                                                          |    |
| 24 | Limitations                  | <a href="#">#19</a> | Trustworthiness and limitations of findings              | 14 |
| 25 |                              |                     |                                                          |    |
| 26 |                              |                     |                                                          |    |
| 27 | <b>Other</b>                 |                     |                                                          |    |
| 28 |                              |                     |                                                          |    |
| 29 |                              |                     |                                                          |    |
| 30 | Conflicts of interest        | <a href="#">#20</a> | Potential sources of influence of perceived influence on | 15 |
| 31 |                              |                     | study conduct and conclusions; how these were            |    |
| 32 |                              |                     | managed                                                  |    |
| 33 |                              |                     |                                                          |    |
| 34 |                              |                     |                                                          |    |
| 35 |                              |                     |                                                          |    |
| 36 |                              |                     |                                                          |    |
| 37 |                              |                     |                                                          |    |
| 38 | Funding                      | <a href="#">#21</a> | Sources of funding and other support; role of funders in | 15 |
| 39 |                              |                     | data collection, interpretation and reporting            |    |
| 40 |                              |                     |                                                          |    |
| 41 |                              |                     |                                                          |    |
| 42 |                              |                     |                                                          |    |

None The SRQR checklist is distributed with permission of Wolters Kluwer © 2014 by the Association of American Medical Colleges. This checklist can be completed online using <https://www.goodreports.org/>, a tool made by the [EQUATOR Network](#) in collaboration with [Penelope.ai](#)
